# Supplementary material
Source: MDPI journal article supplement (https://www.mdpi.com/1424-8247/16/1/30)
Supplement: s1 [file s1]

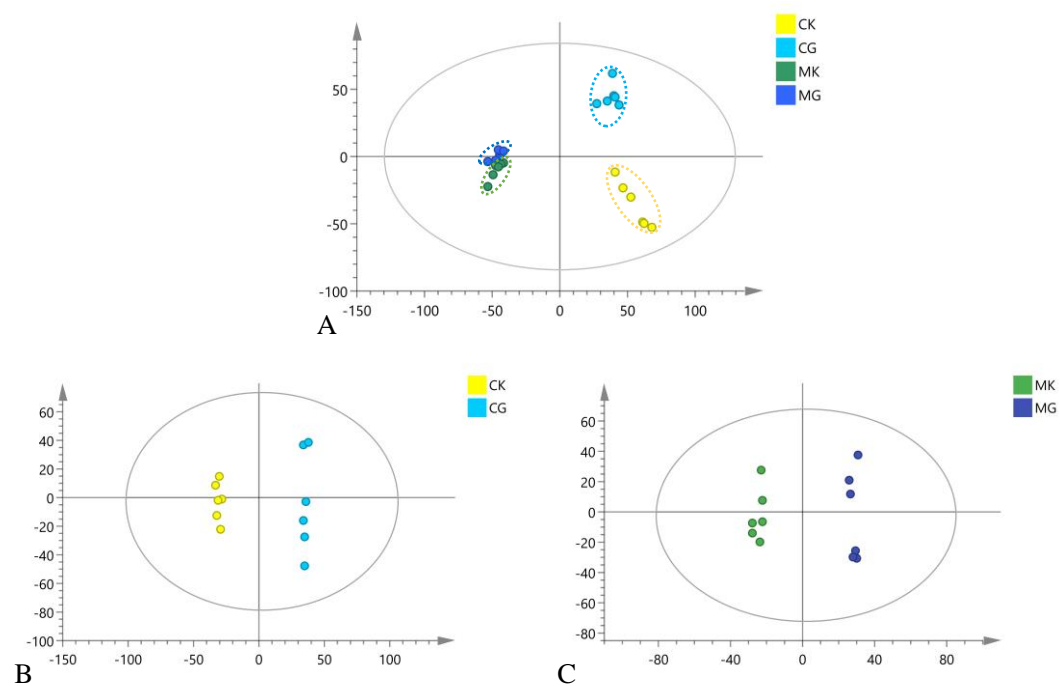

**Figure S1 Multivariate statistical analysis of serum metabolic profile in positive ion mode. A, PCA plot of CK, CG, MK and MG groups; B, OPLS-DA plot of CK and CG groups; C, OPLS-DA plot of MK and MG groups.**

**Table S1 The identified main components of KXS and their relative information**

| No. | Compound                                | t <sub>R</sub> /min | Fomula                                                        | Measured | Mass<br>error/ppm | Ion Addition            | Fragment ions (m/z)                                            |
|-----|-----------------------------------------|---------------------|---------------------------------------------------------------|----------|-------------------|-------------------------|----------------------------------------------------------------|
| 1   | L(+)-Arginine                           | 0.86                | C <sub>6</sub> H <sub>14</sub> N <sub>4</sub> O <sub>2</sub>  | 175.1119 | 4.6               | [M+H] <sup>+</sup>      | 158.0920,130.0971,116.0702,112.0865                            |
| 2   | Sucrose                                 | 4.07                | C <sub>12</sub> H <sub>22</sub> O <sub>11</sub>               | 341.1142 | -4.1              | [M-H] <sup>-</sup>      | 179.0585,161.0478,119.0370,113.0260,89.0258                    |
| 3   | Sibiricose A3                           | 4.15                | C <sub>19</sub> H <sub>26</sub> O <sub>13</sub>               | 461.136  | -1.5              | [M-H] <sup>-</sup>      | 299.0809,281.0701,239.0591,209.0482,179.0374,137.0263          |
| 4   | Sibiricose A5                           | 5.78                | C <sub>22</sub> H <sub>30</sub> O <sub>14</sub>               | 517.1624 | -1.2              | [M-H] <sup>-</sup>      | 341.1133,337.0973,193.0528,175.0425                            |
| 5   | Sibiricose A6                           | 6.15                | C <sub>23</sub> H <sub>32</sub> O <sub>15</sub>               | 547.1743 | 1.5               | [M-H] <sup>-</sup>      | 367.1097,341.1147,223.0632,205.0542,190.0298                   |
| 6   | Sibiricose A1                           | 6.46                | C <sub>23</sub> H <sub>32</sub> O <sub>15</sub>               | 547.1737 | 0.4               | [M-H] <sup>-</sup>      | 367.1099,341.1150,223.0634,205.0544,190.0296                   |
| 7   | Tatarine C                              | 7.74                | C <sub>15</sub> H <sub>20</sub> N <sub>2</sub> O <sub>6</sub> | 323.1299 | -4.9              | [M-H] <sup>-</sup>      | 305.1125,203.0817,189.0661,185.0085,175.0870                   |
| 8   | 2,5-dimethoxy benzoquinone              | 7.95                | C <sub>8</sub> H <sub>8</sub> O <sub>4</sub>                  | 169.0422 | 3.0               | [M+H] <sup>+</sup>      | 151.1116,141.0546,125.0595,123.0802,109.1009                   |
| 9   | Acoramol                                | 8.73                | C <sub>12</sub> H <sub>16</sub> O <sub>4</sub>                | 225.1047 | 1.8               | [M+H] <sup>+</sup>      | 210.0908,207.1036,193.0878,168.0797                            |
| 10  | Tataroside                              | 9.17                | C <sub>26</sub> H <sub>44</sub> O <sub>12</sub>               | 547.2839 | 2.2               | [M-H] <sup>-</sup>      | 529.2719,509.2475,385.2301,367.2193,349.2084,319.1973,301.1862 |
| 11  | Sibiricaxanthone A                      | 9.7                 | C <sub>24</sub> H <sub>26</sub> O <sub>14</sub>               | 537.1311 | -1.1              | [M-H] <sup>-</sup>      | 417.0883,387.0773,315.0552,285.0443,267.0335                   |
| 12  | Polygalaxanthone VI                     | 10.64               | C <sub>23</sub> H <sub>26</sub> O <sub>12</sub>               | 493.1355 | 0.8               | [M-H] <sup>-</sup>      | 317.0634, 302.0456, 175.0561                                   |
| 13  | 2,4,5- Trimethoxybenzoic acid           | 10.68               | C <sub>10</sub> H <sub>12</sub> O <sub>5</sub>                | 213.0669 | -4.7              | [M+H] <sup>+</sup>      | 195.0650,165.0004                                              |
| 14  | PolygalaxanthoneIII                     | 10.85               | C <sub>25</sub> H <sub>28</sub> O <sub>15</sub>               | 567.1432 | 1.7               | [M-H] <sup>-</sup>      | 447.0994,417.0884,399.0775,345.0663,315.0554,272.0364          |
| 15  | Ginsenjilanol/Majonoside R <sub>1</sub> | 10.89               | C <sub>42</sub> H <sub>72</sub> O <sub>15</sub>               | 861.4854 | -2.1              | [M-H+HCOO] <sup>-</sup> | 815.4890,653.4346,635.4238,553.3450,491.3822,391.2922          |
| 16  | Sibiricose A2                           | 12.3                | C <sub>24</sub> H <sub>34</sub> O <sub>15</sub>               | 561.1884 | -1.4              | [M-H] <sup>-</sup>      | 323.1041,279.0920,237.0797                                     |
| 17  | Lancerin                                | 12.4                | C <sub>19</sub> H <sub>18</sub> O <sub>10</sub>               | 405.0882 | -2.9              | [M-H] <sup>-</sup>      | 315.0492,297.0388,285.0389,257.0444,243.1227                   |
| 18  | Tenuifoliside B                         | 12.58               | C <sub>30</sub> H <sub>36</sub> O <sub>17</sub>               | 667.1955 | 1.1               | [M-H] <sup>-</sup>      | 461.1363,281.0704,239.0579,205.0534                            |
| 19  | Tatarinoids A                           | 13.98               | C <sub>12</sub> H <sub>16</sub> O <sub>5</sub>                | 241.0989 | -1.2              | [M+H] <sup>+</sup>      | 223.0959,215.2825,195.1012,169.0856,154.0621                   |
| 20  | Acoramone                               | 14                  | C <sub>12</sub> H <sub>16</sub> O <sub>4</sub>                | 225.1039 | -1.7              | [M+H] <sup>+</sup>      | 210.0909,207.1038,193.0879,168.0799                            |
| 21  | 3,6'-Disinapoyl sucrose                 | 14.15               | C <sub>34</sub> H <sub>42</sub> O <sub>19</sub>               | 753.2334 | 2.6               | [M-H] <sup>-</sup>      | 547.1742,529.1635,367.1100,265.0752,223.0634                   |
| 22  | Ginsenjilanol/Majonoside R <sub>1</sub> | 14.19               | C <sub>42</sub> H <sub>72</sub> O <sub>15</sub>               | 861.4896 | 3.1               | [M-H+HCOO] <sup>-</sup> | 815.4736,653.4221,553.3343,491.0968                            |

|    |                                 |       |                                                 |           |      |                         |                                                                                                |
|----|---------------------------------|-------|-------------------------------------------------|-----------|------|-------------------------|------------------------------------------------------------------------------------------------|
| 23 | Sibiricose A4                   | 14.66 | C <sub>34</sub> H <sub>42</sub> O <sub>19</sub> | 753.2335  | 2.7  | [M-H] <sup>-</sup>      | 547.1734,529.1627,367.1100,265.0758,223.0634                                                   |
| 24 | (Z)-Coniferyl alcohol           | 14.69 | C <sub>10</sub> H <sub>12</sub> O <sub>3</sub>  | 181.0777  | -1.6 | [M+H] <sup>+</sup>      | 151.0769,148.0534,138.0689,121.0660,107.9603                                                   |
| 25 | Tenuifoliside A                 | 14.79 | C <sub>31</sub> H <sub>38</sub> O <sub>17</sub> | 681.2106  | 4.3  | [M-H] <sup>-</sup>      | 635.2631,473.1381,443.1272,281.0714,239.0592,223.0635                                          |
| 26 | Notoginsenoside N               | 15.11 | C <sub>48</sub> H <sub>82</sub> O <sub>19</sub> | 1007.5436 | -8.3 | [M-H+HCOO] <sup>-</sup> | 799.4949,637.4404,475.3856,391.2919                                                            |
| 27 | 2,4,5-Trimethoxybenzaldehyde    | 15.19 | C <sub>10</sub> H <sub>12</sub> O <sub>4</sub>  | 197.0726  | -2.0 | [M+H] <sup>+</sup>      | 182.0570,169.0855,154.0621,138.0673                                                            |
| 28 | Asaronaldehyde                  | 15.21 | C <sub>10</sub> H <sub>12</sub> O <sub>4</sub>  | 197.0728  | -1.0 | [M+H] <sup>+</sup>      | 182.0571,169.0856,154.0622,138.0673                                                            |
| 29 | 20-O-Glucosylginsenoside Rf     | 15.66 | C <sub>48</sub> H <sub>82</sub> O <sub>19</sub> | 1007.5433 | -1.1 | [M-H+HCOO] <sup>-</sup> | 799.4956,637.4409,475.3860,391.2922                                                            |
| 30 | Reiniose B                      | 15.99 | C <sub>29</sub> H <sub>34</sub> O <sub>15</sub> | 621.1881  | -1.7 | [M-H] <sup>-</sup>      | 499.1422,445.1322,337.0908,193.0498,175.0394                                                   |
| 31 | Notoginsenoside Fp <sub>1</sub> | 16.24 | C <sub>47</sub> H <sub>80</sub> O <sub>18</sub> | 977.5321  | -1.9 | [M-H+HCOO] <sup>-</sup> | 799.4938,637.4397,475.3869,391.2921                                                            |
| 32 | Tenuifoliside W                 | 16.38 | C <sub>67</sub> H <sub>86</sub> O <sub>39</sub> | 1513.4674 | -4.3 | [M-H] <sup>-</sup>      | 1367.3986,1325.3891,1191.3531,1149.3431,1131.3330,1069.3175                                    |
| 33 | Ginsenoside Rg <sub>1</sub>     | 17.37 | C <sub>42</sub> H <sub>72</sub> O <sub>14</sub> | 845.4935  | 2.3  | [M-H+HCOO] <sup>-</sup> | 799.4956,637.4409,619.4301,475.3861                                                            |
| 34 | Ginsenoside Re                  | 17.43 | C <sub>48</sub> H <sub>82</sub> O <sub>18</sub> | 991.5533  | 3.3  | [M-H+HCOO] <sup>-</sup> | 945.5263,799.4943,783.4994,637.4403,475.3876,391.2927                                          |
| 35 | Tenuifoliside V                 | 17.79 | C <sub>53</sub> H <sub>70</sub> O <sub>33</sub> | 1233.3811 | 1.4  | [M-H] <sup>-</sup>      | 1191.3524,1173.3422,1111.3266,1057.3166,1015.3064,997.2962,935.2810,893.2808,731.2196,527.1578 |
| 36 | Tenuifoliose G                  | 17.82 | C <sub>66</sub> H <sub>84</sub> O <sub>38</sub> | 1483.4735 | 6.7  | [M-H] <sup>-</sup>      | 1337.4143,1215.3769,1161.3658,1143.3553,1119.3548,1101.3441,1039.3276,997.3165                 |
| 37 | Tenuifoliose M                  | 17.83 | C <sub>65</sub> H <sub>82</sub> O <sub>37</sub> | 1453.4636 | 7.3  | [M-H] <sup>-</sup>      | 1337.4144,1215.3772,1161.3659,1143.3555,1101.3443,1039.3280,997.3169                           |
| 38 | Tenuifoliose L                  | 18.12 | C <sub>67</sub> H <sub>84</sub> O <sub>38</sub> | 1495.4753 | 7.8  | [M-H] <sup>-</sup>      | 1349.4150,1307.4043,1203.3768,1185.3665,1161.3662,1143.3555,1081.3391,1039.3282,795.2454       |
| 39 | Tenuifoliose F                  | 18.3  | C <sub>68</sub> H <sub>86</sub> O <sub>39</sub> | 1525.4795 | 3.6  | [M-H] <sup>-</sup>      | 1379.4001,1337.3901,1319.3798,1203.3546,1161.3442,1143.3337                                    |
| 40 | Tenuifoliside C                 | 18.34 | C <sub>35</sub> H <sub>44</sub> O <sub>19</sub> | 767.2484  | 1.6  | [M-H] <sup>-</sup>      | 529.1628,367.1100,325.0986,265.0757,223.0634                                                   |
| 41 | Tenuifoliose K                  | 18.35 | C <sub>57</sub> H <sub>70</sub> O <sub>32</sub> | 1265.3925 | 6.3  | [M-H] <sup>-</sup>      | 1119.3546,1101.3449,1077.3443,1059.3337,997.3170,973.3169,915.2893,835.2625,753.2348           |
| 42 | Isocalamediol                   | 18.73 | C <sub>15</sub> H <sub>22</sub> O <sub>3</sub>  | 251.1573  | 3.9  | [M+H] <sup>+</sup>      | 233.1534,215.1429,205.1586,191.1429,173.1324                                                   |
| 43 | Tenuifoliose T                  | 18.76 | C <sub>56</sub> H <sub>70</sub> O <sub>32</sub> | 1253.3884 | 3.1  | [M-H] <sup>-</sup>      | 1131.3531,1107.3531,1077.3421,985.3151,929.2827,823.2608                                       |

|    |                                                                                      |       |                                                               |           |      |                         |                                                                                         |
|----|--------------------------------------------------------------------------------------|-------|---------------------------------------------------------------|-----------|------|-------------------------|-----------------------------------------------------------------------------------------|
| 44 | Tenuifoliose P                                                                       | 18.8  | C <sub>59</sub> H <sub>74</sub> O <sub>34</sub>               | 1325.4141 | 6.4  | [M-H] <sup>-</sup>      | 1203.3754,1119.3532,1077.3424,997.3155,753.2337                                         |
| 45 | Tenuifoliose E                                                                       | 18.82 | C <sub>58</sub> H <sub>72</sub> O <sub>33</sub>               | 1295.3989 | 3.0  | [M-H] <sup>-</sup>      | 1119.3542,1077.3436,997.3165,979.3058,753.2347                                          |
| 46 | isoacoramone                                                                         | 19.07 | C <sub>12</sub> H <sub>16</sub> O <sub>4</sub>                | 225.1036  | -3.1 | [M+H] <sup>+</sup>      | 210.0883,193.0855,165.0908                                                              |
| 47 | Tenuifolioside S                                                                     | 19.43 | C <sub>35</sub> H <sub>68</sub> O <sub>31</sub>               | 1223.3787 | 3.9  | [M-H] <sup>-</sup>      | 1101.3437,1077.3437,1061.3275,955.3054,899.2728,793.2511,613.1856                       |
| 48 | Tenuifoliose X                                                                       | 19.64 | C <sub>37</sub> H <sub>72</sub> O <sub>33</sub>               | 1283.4029 | 6.1  | [M-H] <sup>-</sup>      | 1161.3653,1131.3544,1107.3544,1089.3438,985.3162,959.2944,823.2618                      |
| 49 | (E)-3-(2,4,5- Trimethoxyphenyl) acrylaldehyde                                        | 19.98 | C <sub>12</sub> H <sub>14</sub> O <sub>4</sub>                | 223.0879  | -3.1 | [M+H] <sup>+</sup>      | 208.0727,195.1011,167.0700,165.0907                                                     |
| 50 | Polygalasaponin XXIX                                                                 | 20.3  | C <sub>64</sub> H <sub>102</sub> O <sub>33</sub>              | 1397.6297 | -5.3 | [M-H] <sup>-</sup>      | 1367.5941, 1143.5597, 717.2361, 455.3165, 425.3011                                      |
| 51 | Tatarine A                                                                           | 20.83 | C <sub>17</sub> H <sub>13</sub> NO <sub>3</sub>               | 280.0882  | -2.5 | [M+H] <sup>+</sup>      | 280.0965,265.0730,252.0653,236.0704                                                     |
| 52 | Tenuifoliose B                                                                       | 21    | C <sub>60</sub> H <sub>74</sub> O <sub>34</sub>               | 1337.4129 | 5.4  | [M-H] <sup>-</sup>      | 1295.4021,1215.3751,1161.3638,1143.3532,1119.3530,1101.3425,1039.3262,997.3151,753.2330 |
| 53 | Pseudoginsenoside Rt <sub>3</sub>                                                    | 21.06 | C <sub>41</sub> H <sub>70</sub> O <sub>13</sub>               | 815.4845  | 4.5  | [M-H+HCOO] <sup>-</sup> | 769.4845,637.4408,619.4300,475.3858,                                                    |
| 54 | Desacylsenegasaponin B                                                               | 21.08 | C <sub>59</sub> H <sub>94</sub> O <sub>29</sub>               | 1265.5754 | -9.5 | [M-H] <sup>-</sup>      | 1235.5620,585.2000,499.1638,455.3140,425.3035                                           |
| 55 | Onjisaponin Pg                                                                       | 21.19 | C <sub>70</sub> H <sub>110</sub> O <sub>37</sub>              | 1541.6811 | 5.8  | [M-H] <sup>-</sup>      | 1397.6370,1367.6276,1173.5828,455.3243                                                  |
| 56 | 2,3,3a,7,8,8a-Hexahydro3a-hydroxy-1,4-dimethyl7-(1-methylethylidene)-6(1H)-azulenone | 21.2  | C <sub>15</sub> H <sub>22</sub> O <sub>2</sub>                | 235.1626  | 5.1  | [M+H] <sup>+</sup>      | 217.1585,207.1378,193.1584,175.1480,161.1324,133.1010,119.0854                          |
| 57 | Tenuifoliose C                                                                       | 21.4  | C <sub>38</sub> H <sub>72</sub> O <sub>33</sub>               | 1295.4033 | 6.4  | [M-H] <sup>-</sup>      | 1173.3656,1119.3541,1101.3441,1077.3436,1059.3328,997.3165,851.2782,753.2347            |
| 58 | Floralginsenoside B                                                                  | 21.71 | C <sub>41</sub> H <sub>70</sub> O <sub>13</sub>               | 815.4823  | 1.7  | [M-H+HCOO] <sup>-</sup> | 769.4688,637.4276,475.3761,391.2830                                                     |
| 59 | Notoginsenoside Rt                                                                   | 21.9  | C <sub>44</sub> H <sub>74</sub> O <sub>15</sub>               | 887.4989  | -4.0 | [M-H+HCOO] <sup>-</sup> | 841.4894,799.4790,781.4690,637.4278,619.4175,475.3763,391.2831                          |
| 60 | Tenuifoliose O                                                                       | 21.93 | C <sub>61</sub> H <sub>76</sub> O <sub>35</sub>               | 1367.4178 | 1.2  | [M-H] <sup>-</sup>      | 1191.3748,1149.3641,1131.3532,425.3133                                                  |
| 61 | Tataramide B                                                                         | 22.13 | C <sub>36</sub> H <sub>36</sub> N <sub>2</sub> O <sub>8</sub> | 625.2433  | -5.2 | [M-H] <sup>-</sup>      | 488.1698,462.1909,364.1177,325.1069                                                     |

|    |                                       |       |                                                  |            |      |                         |                                                                                 |
|----|---------------------------------------|-------|--------------------------------------------------|------------|------|-------------------------|---------------------------------------------------------------------------------|
| 62 | Polygalasaponin XXII                  | 22.19 | C <sub>58</sub> H <sub>92</sub> O <sub>28</sub>  | 1236.5847  | 9.3  | [M-H] <sup>-</sup>      | 1205.5728,1011.5285,981.5175,455.3247,425.3138                                  |
| 63 | 6'-acetyl-ginsenoside Rg <sub>1</sub> | 22.2  | C <sub>44</sub> H <sub>74</sub> O <sub>15</sub>  | 887.4952   | -8.3 | [M-H+HCOO] <sup>-</sup> | 841.4876,799.4772,781.4637,637.4263,619.4161,475.3754,391.2825                  |
| 64 | Onjisaponin Qg                        | 22.25 | C <sub>76</sub> H <sub>120</sub> O <sub>41</sub> | 1687.7419  | 7.1  | [M-H] <sup>-</sup>      | 1585.7100,1543.6989,1513.6892,1411.6561                                         |
| 65 | Polygalasaponin XXIII                 | 22.46 | C <sub>53</sub> H <sub>82</sub> O <sub>24</sub>  | 1101.5169  | -1.9 | [M-H] <sup>-</sup>      | 1071.4942,1059.3133,453.2982,423.2879                                           |
| 66 | Polygalasaponin XXVIII                | 22.93 | C <sub>53</sub> H <sub>84</sub> O <sub>24</sub>  | 1103..5416 | 6.2  | [M-H] <sup>-</sup>      | 1073.5290,455.3241,425.3132                                                     |
| 67 | Tenuifolioside D                      | 23.07 | C <sub>60</sub> H <sub>74</sub> O <sub>34</sub>  | 1337.3996  | -4.5 | [M-H] <sup>-</sup>      | 1295.3786,1215.3531,1161.3427,1143.3327,1119.3327,1101.3221,1039.3070,997.2967, |
| 68 | Tenuifolioside H                      | 23.53 | C <sub>61</sub> H <sub>74</sub> O <sub>34</sub>  | 1349.4042  | -1.0 | [M-H] <sup>-</sup>      | 1203.3753,1161.3647,1143.3543,1081.3377,1039.3269                               |
| 69 | Onjisaponin TG                        | 23.68 | C <sub>64</sub> H <sub>100</sub> O <sub>32</sub> | 1379.6145  | -3.4 | [M-H] <sup>-</sup>      | 1317.6220,1277.5892,1235.5848,1205.5677,455.3267                                |
| 70 | Tenuifolioside J                      | 23.69 | C <sub>59</sub> H <sub>72</sub> O <sub>33</sub>  | 1307.4036  | 6.5  | [M-H] <sup>-</sup>      | 1265.3927,1161.3656,1143.3548,1131.3547,1119.3547,1039.3276,997.3167            |
| 71 | Onjisaponin TF                        | 23.77 | C <sub>59</sub> H <sub>94</sub> O <sub>28</sub>  | 1249.5994  | 5.4  | [M-H] <sup>-</sup>      | 1219.5903,1025.5456,995.5347,455.3229,425.3119                                  |
| 72 | Reinioside F                          | 23.98 | C <sub>69</sub> H <sub>108</sub> O <sub>36</sub> | 1511.6691  | 5.1  | [M-H] <sup>-</sup>      | 1367.6285,1337.6186,1293.4099,1143.5737,455.3231                                |
| 73 | Onjisaponin TE                        | 24.28 | C <sub>70</sub> H <sub>110</sub> O <sub>36</sub> | 1525.6882  | 7.2  | [M-H] <sup>-</sup>      | 1423.6532,1381.6418,1351.6320,1157.5872,455.3243                                |
| 74 | Tenuifolioside A                      | 25.16 | C <sub>62</sub> H <sub>76</sub> O <sub>35</sub>  | 1379.4038  | -8.9 | [M-H] <sup>-</sup>      | 1337.4094,1203.3698,1161.3585,1143.3480,1081.3319, 1039.3201                    |
| 75 | Tenuifolioside N                      | 25.61 | C <sub>63</sub> H <sub>78</sub> O <sub>36</sub>  | 1409.4351  | 5.9  | [M-H] <sup>-</sup>      | 1233.3870,1215.3772,1191.3765,1173.3662,1111.3496,1069.3385,825.2564            |
| 76 | Ginsenoside Rf                        | 25.68 | C <sub>42</sub> H <sub>72</sub> O <sub>14</sub>  | 845.4854   | -7.7 | [M-H+HCOO] <sup>-</sup> | 799.4787,637.4279,475.3762                                                      |
| 77 | β-Asarone                             | 28.13 | C <sub>12</sub> H <sub>16</sub> O <sub>3</sub>   | 209.1088   | -2.4 | [M+H] <sup>-</sup>      | 208.0754,194.0935,181.0857,162.0674,149.0960,121.0646                           |
| 78 | α-Asarone                             | 28.14 | C <sub>12</sub> H <sub>16</sub> O <sub>3</sub>   | 209.1081   | -5.4 | [M+H] <sup>-</sup>      | 208.0755,194.0935,181.0857,162.0674,149.0959,121.0646                           |
| 79 | Tenuifolin                            | 28.21 | C <sub>36</sub> H <sub>56</sub> O <sub>12</sub>  | 679.3767   | 1.4  | [M-H] <sup>-</sup>      | 455.3245,425.3136                                                               |
| 80 | Notoginsenoside Fa                    | 28.38 | C <sub>59</sub> H <sub>100</sub> O <sub>27</sub> | 1239.6489  | 3.4  | [M-H+HCOO] <sup>-</sup> | 1107.6090,1077.5988,945.5547,783.5003,621.4455, 459.3906                        |
| 81 | Ligraminol C                          | 29.32 | C <sub>23</sub> H <sub>28</sub> O <sub>6</sub>   | 401.1851   | -7.2 | [M+H] <sup>-</sup>      | 383.1846,371.1847,263.1274,233.1169,218.0934,195.1013,181.0856,151.0751         |
| 82 | Ginsenoside Rg <sub>2</sub>           | 29.5  | C <sub>42</sub> H <sub>72</sub> O <sub>13</sub>  | 829.4908   | -8.1 | [M-H+HCOO] <sup>-</sup> | 783.4700,637.4271,475.3758,391.2828                                             |

|     |                                                      |       |                                                  |           |      |                         |                                                              |
|-----|------------------------------------------------------|-------|--------------------------------------------------|-----------|------|-------------------------|--------------------------------------------------------------|
| 83  | Ginsenoside Rh <sub>1</sub>                          | 29.73 | C <sub>36</sub> H <sub>62</sub> O <sub>9</sub>   | 683.4379  | -1.4 | [M-H+HCOO] <sup>-</sup> | 637.4328,475.3793                                            |
| 84  | Ginsenoside Ra <sub>2</sub>                          | 30.76 | C <sub>58</sub> H <sub>98</sub> O <sub>26</sub>  | 1209.6383 | 3.5  | [M-H+HCOO] <sup>-</sup> | 1077.5980,945.5546,783.5001,621.4455,459.3906, 375.2972      |
| 85  | Ginsenoside Rb <sub>1</sub>                          | 31.74 | C <sub>54</sub> H <sub>92</sub> O <sub>23</sub>  | 1153.6052 | 2.6  | [M-H+HCOO] <sup>-</sup> | 1107.6075,945.5536,783.4993,621.4449,459.3925, 375.2978      |
| 86  | Ligraminol D                                         | 32    | C <sub>21</sub> H <sub>28</sub> O <sub>6</sub>   | 375.1893  | 3.4  | [M+H] <sup>+</sup>      | 357.1787,295.2317,277.2209,263.0993,191.0773,183.1416        |
| 87  | Ginsenoside Ro                                       | 32.59 | C <sub>48</sub> H <sub>76</sub> O <sub>19</sub>  | 955.4961  | -2.0 | [M-H] <sup>-</sup>      | 793.4325,731.4329,613.3706,569.3811,523.3759,455.3503        |
| 88  | Ginsenoside Ra <sub>1</sub>                          | 33.5  | C <sub>58</sub> H <sub>98</sub> O <sub>26</sub>  | 1209.6397 | 4.2  | [M-H+HCOO] <sup>-</sup> | 1077.5986,945.5553,915.5445,783.5006,621.4459, 459.3911      |
| 89  | Ginsenoside F <sub>1</sub>                           | 35.1  | C <sub>36</sub> H <sub>62</sub> O <sub>9</sub>   | 683.4337  | -8.7 | [M-H+HCOO] <sup>-</sup> | 637.4274,475.3761,391.2832                                   |
| 90  | Ginsenoside Rb <sub>2</sub>                          | 35.13 | C <sub>53</sub> H <sub>90</sub> O <sub>22</sub>  | 1123.5988 | 6.4  | [M-H+HCOO] <sup>-</sup> | 1077.5937,945.5550,783.5004,621.4458,459.3908, 375.2970      |
| 91  | Chikusetsusaponin Iv                                 | 36.23 | C <sub>47</sub> H <sub>74</sub> O <sub>18</sub>  | 925.4904  | 3.1  | [M-H+HCOO] <sup>-</sup> | 793.4323,613.3702,569.3808,455.3503                          |
| 92  | 1,6-Dihydroxy-3,5,7-trimethoxyxanthone               | 37.06 | C <sub>16</sub> H <sub>14</sub> O <sub>7</sub>   | 317.0705  | -9.1 | [M-H] <sup>-</sup>      | 302.0471,287.0238,                                           |
| 93  | Quinquenoside R <sub>1</sub>                         | 37.64 | C <sub>56</sub> H <sub>94</sub> O <sub>24</sub>  | 1149.6098 | -3.2 | [M-H+HCOO] <sup>-</sup> | 1107.5863,1059.5667,945.5354,783.4842,621.4325, 459.3810     |
| 94  | Chikusetsusaponin Iva                                | 38.2  | C <sub>42</sub> H <sub>66</sub> O <sub>14</sub>  | 793.4487  | 5.0  | [M-H+HCOO] <sup>-</sup> | 793.3949,631.3805,613.3705,569.3808,455.3501                 |
| 95  | Ginsenoside Rd                                       | 39.22 | C <sub>48</sub> H <sub>82</sub> O <sub>18</sub>  | 991.558   | 8.9  | [M-H+HCOO] <sup>-</sup> | 945.5084,783.5003,621.4458,459.3908,375.2970                 |
| 96  | Ginsenoside Rs <sub>1</sub> /Rs <sub>2</sub> /isomer | 40.17 | C <sub>55</sub> H <sub>92</sub> O <sub>23</sub>  | 1165.6135 | 9.4  | [M-H+HCOO] <sup>-</sup> | 1077.5979,1059.5882,945.5550,783.5004,621.4456, 459.3923     |
| 97  | Isoeugenol                                           | 40.32 | C <sub>11</sub> H <sub>14</sub> O <sub>2</sub>   | 179.0978  | -5.6 | [M+H] <sup>+</sup>      | 164.0783,151.0750,121.0645,91.0539                           |
| 98  | Malonyl-Rd                                           | 41.76 | C <sub>51</sub> H <sub>84</sub> O <sub>21</sub>  | 1031.5549 | 4.8  | [M-H+HCOO] <sup>-</sup> | 987.5645,945.5505,459.5828                                   |
| 99  | Ginsenoside Rs <sub>1</sub> /Rs <sub>2</sub> /isomer | 42.44 | C <sub>55</sub> H <sub>92</sub> O <sub>23</sub>  | 1165.6052 | 2.0  | [M-H+HCOO] <sup>-</sup> | 1077.5982,1059.5883,945.5553,783.5006,621.4461, 459.3923     |
| 100 | OnjisaponinFg                                        | 42.47 | C <sub>81</sub> H <sub>120</sub> O <sub>40</sub> | 1731.7378 | 1.6  | [M-H] <sup>-</sup>      | 1701.7386,1669.7474,1629.7157,1599.7054,1587.7045,1557.6939, |
| 101 | Ginsenoside Rs <sub>1</sub> /Rs <sub>2</sub> /isomer | 43.24 | C <sub>55</sub> H <sub>92</sub> O <sub>23</sub>  | 1165.6045 | 1.4  | [M-H+HCOO] <sup>-</sup> | 1077.5969,1059.5866,945.5538,783.4991,621.4453               |
| 102 | Ginsenoside Ra <sub>6</sub>                          | 44.5  | C <sub>58</sub> H <sub>96</sub> O <sub>24</sub>  | 1221.6218 | -6.2 | [M-H+HCOO] <sup>-</sup> | 1175.5556,1107.6091,1089.5992,945.5550,783.5004, 621.4462,   |
| 103 | Onjisaponin F                                        | 45.03 | C <sub>75</sub> H <sub>112</sub> O <sub>36</sub> | 1587.6789 | -8.6 | [M-H] <sup>-</sup>      | 1587.6463,1557.6364,567.1937                                 |
| 104 | Onjisaponin TH                                       | 45.36 | C <sub>65</sub> H <sub>96</sub> O <sub>28</sub>  | 1323.6173 | 6.8  | [M-H] <sup>-</sup>      | 1293.6066,455.3230,425.3134                                  |
| 105 | Onjisaponin L                                        | 45.98 | C <sub>86</sub> H <sub>128</sub> O <sub>43</sub> | 1847.7707 | -6.2 | [M-H] <sup>-</sup>      | 1847.7648,1785.7613,1703.7221,1673.7072,                     |
| 106 | Ginsenoside Rd <sub>2</sub> /Notoginsenoside Fe      | 46.54 | C <sub>47</sub> H <sub>80</sub> O <sub>17</sub>  | 961.5406  | 1.2  | [M-H+HCOO] <sup>-</sup> | 915.5426,783.4992,621.4448,                                  |
| 107 | γ-Asarone                                            | 46.76 | C <sub>12</sub> H <sub>16</sub> O <sub>3</sub>   | 209.1081  | -5.7 | [M+H] <sup>+</sup>      | 194.0936,181.0858,162.0675,149.0960,121.0647                 |

|     |                                    |       |                                                  |           |      |                         |                                                                              |
|-----|------------------------------------|-------|--------------------------------------------------|-----------|------|-------------------------|------------------------------------------------------------------------------|
| 108 | Ginsenoside Rd2/Notoginsenoside Fe | 47.54 | C <sub>47</sub> H <sub>80</sub> O <sub>17</sub>  | 961.5364  | -3.3 | [M-H+HCOO] <sup>-</sup> | 915.5249,783.4828,459.5309                                                   |
| 109 | Onjisaponin R                      | 47.69 | C <sub>76</sub> H <sub>114</sub> O <sub>37</sub> | 1617.6912 | -7.4 | [M-H] <sup>-</sup>      | 1617.7119,1587.7009,1155.5672,1125.5544,699.2368,613.1994,455.3162           |
| 110 | Onjisaponin B                      | 48    | C <sub>75</sub> H <sub>112</sub> O <sub>35</sub> | 1571.6915 | -4.1 | [M-H] <sup>-</sup>      | 1571.7065,1541.6960,1317.6380,567.1940,455.3168                              |
| 111 | Onjisaponin V                      | 49.46 | C <sub>82</sub> H <sub>122</sub> O <sub>41</sub> | 1761.7345 | -6.3 | [M-H] <sup>-</sup>      | 1761.7580,1699.7570,1659.7247,1617.7113,1587.7023                            |
| 112 | Onjisaponin H                      | 49.88 | C <sub>74</sub> H <sub>110</sub> O <sub>34</sub> | 1541.672  | -9.9 | [M-H] <sup>-</sup>      | 1541.6706,1511.6602,,1317.6185,1287.6085,1139.5572,537.1791,455.3119         |
| 113 | Polygalasaponin XXXII              | 50.09 | C <sub>79</sub> H <sub>118</sub> O <sub>38</sub> | 1673.7166 | -7.7 | [M-H] <sup>-</sup>      | 1673.7377,1643.7293,1449.6823,1419.6711,1287.6262,669.2264,537.1830          |
| 114 | Onjisaponin E                      | 50.62 | C <sub>71</sub> H <sub>106</sub> O <sub>33</sub> | 1485.6474 | -9.1 | [M-H] <sup>-</sup>      | 1485.6682,1455.6572,675.3919,455.3170,425.3063                               |
| 115 | Onjisaponin Z                      | 51.1  | C <sub>71</sub> H <sub>106</sub> O <sub>32</sub> | 1469.6528 | -9.0 | [M-H] <sup>-</sup>      | 1469.6726,1439.6610,1245.6153,1215.6043,1007.5269,953.4944,455.3169,425.3063 |
| 116 | Onjisaponin Ng                     | 51.38 | C <sub>80</sub> H <sub>118</sub> O <sub>38</sub> | 1685.7187 | -6.4 | [M-H] <sup>-</sup>      | 1685.7398,1583.7063,1541.6928,1317.6375,537.1826                             |
| 117 | 1-(4-Methoxyphenyl)allyl acetate   | 51.61 | C <sub>12</sub> H <sub>14</sub> O <sub>3</sub>   | 207.0922  | -7.2 | [M+H] <sup>+</sup>      | 176.0830,151.0753,133.0647                                                   |
| 118 | Onjisaponin G                      | 52.55 | C <sub>70</sub> H <sub>104</sub> O <sub>32</sub> | 1455.6534 | 1.9  | [M-H] <sup>-</sup>      | 1455.6324,1425.6491,993.4977,963.4878,537.1776,455.3132,425.3029             |
| 119 | Onjisaponin Y                      | 53.37 | C <sub>69</sub> H <sub>102</sub> O <sub>30</sub> | 1409.6325 | -8.8 | [M-H] <sup>-</sup>      | 1409.6258,1379.6146,1277.5839,1247.5737,1185.5737,455.3132,425.30298         |
| 120 | Onjisaponin W                      | 54.06 | C <sub>81</sub> H <sub>120</sub> O <sub>40</sub> | 1731.7237 | -6.5 | [M-H] <sup>-</sup>      | 1731.6851,1669.6867,1629.6564,1587.6474,1557.6385, 669.2263                  |
| 121 | Onjisaponin S                      | 54.15 | C <sub>81</sub> H <sub>122</sub> O <sub>40</sub> | 1733.7487 | -1.0 | [M-H] <sup>-</sup>      | 1733.7534,1670.7480,1630.7152,1588.7031,1558.6937                            |
| 122 | Ginsenoside F <sub>2</sub>         | 56.02 | C <sub>42</sub> H <sub>72</sub> O <sub>13</sub>  | 829.4897  | -8.9 | [M-H+HCOO] <sup>-</sup> | 783.4848,621.4332,459.3817                                                   |
| 123 | Bu-Gypenoside XVI                  | 56.13 | C <sub>32</sub> H <sub>86</sub> O <sub>19</sub>  | 1059.5688 | -7.3 | [M-H+HCOO] <sup>-</sup> | 1013.5601,945.5060,927.5257,783.4837,765.4736,621.4328,459.3807              |
| 124 | Onjisaponin Gg                     | 56.2  | C <sub>76</sub> H <sub>112</sub> O <sub>36</sub> | 1599.7023 | 6.0  | [M-H] <sup>-</sup>      | 1569.6940,1497.6727,1455.6623,1425.6517,1155.5739,537.1901,455.3231          |
| 125 | Onjisaponin MF                     | 57.13 | C <sub>63</sub> H <sub>92</sub> O <sub>26</sub>  | 1263.5839 | -2.5 | [M-H] <sup>-</sup>      | 1233.5610,615.3648,455.3137,425.3034                                         |

|     |                                                                                 |       |                                                 |           |      |                         |                                                          |
|-----|---------------------------------------------------------------------------------|-------|-------------------------------------------------|-----------|------|-------------------------|----------------------------------------------------------|
| 126 | Butenyl group-Rd                                                                | 59.41 | C <sub>32</sub> H <sub>86</sub> O <sub>19</sub> | 1059.5722 | -4.0 | [M-H+HCOO] <sup>-</sup> | 1013.5604,945.5368,927.5260,783.4842,765.4734, 621.4321, |
| 127 | Ginsenoside Rg <sub>3</sub>                                                     | 59.69 | C <sub>42</sub> H <sub>72</sub> O <sub>13</sub> | 829.5012  | 5.7  | [M-H+HCOO] <sup>-</sup> | 783.4806,621.4456,459.3907,375.2970,                     |
| 128 | 20(S)-6"-O-acetylginsenoside Rg <sub>3</sub>                                    | 61.83 | C <sub>44</sub> H <sub>74</sub> O <sub>14</sub> | 871.5101  | 2.8  | [M-H+HCOO] <sup>-</sup> | 783.4993,765.4890,621.4451,459.3924                      |
| 129 | Veraguensin                                                                     | 61.93 | C <sub>22</sub> H <sub>28</sub> O <sub>5</sub>  | 373.1956  | 6.7  | [M+H] <sup>+</sup>      | 235.1325,217.1221,191.1064,167.0701,151.0752             |
| 130 | Poricoic acid HM                                                                | 62.82 | C <sub>32</sub> H <sub>50</sub> O <sub>5</sub>  | 513.3645  | -1.4 | [M-H] <sup>-</sup>      | 469.3403,453.3453,441.3087                               |
| 131 | Magnosalicin                                                                    | 63.07 | C <sub>24</sub> H <sub>32</sub> O <sub>7</sub>  | 433.2165  | 5.3  | [M+H] <sup>+</sup>      | 415.2113,401.1956,369.3148,265.1432,247.1327,181.0858    |
| 132 | Poricoic acid GM                                                                | 63.37 | C <sub>31</sub> H <sub>48</sub> O <sub>5</sub>  | 499.3486  | -2.0 | [M-H] <sup>-</sup>      | 469.3296,455.3594,397.3180,353.2547                      |
| 133 | 24(R)-pseudoginsenoside RT <sub>5</sub> /isomer                                 | 64.04 | C <sub>33</sub> H <sub>58</sub> O <sub>14</sub> | 723.3864  | 5.6  | [M-H+HCOO] <sup>-</sup> | 677.3842,397.1423                                        |
| 134 | 16-Deoxyporicoic acid B                                                         | 64.27 | C <sub>30</sub> H <sub>44</sub> O <sub>4</sub>  | 467.3226  | -1.7 | [M-H] <sup>-</sup>      | 452.2993,437.2757,423.2597,407.3010,313.2424             |
| 135 | (-)-cadala-1,4,9-triene                                                         | 64.98 | C <sub>15</sub> H <sub>22</sub>                 | 203.1736  | 9.9  | [M+H] <sup>+</sup>      | 175.1479,161.1323,147.1166                               |
| 136 | Poriacosone B                                                                   | 64.99 | C <sub>30</sub> H <sub>46</sub> O <sub>5</sub>  | 485.3338  | -0.2 | [M-H] <sup>-</sup>      | 485.2895,469.2580,439.3280,386.1708,337.2220             |
| 137 | 24(R)-pseudoginsenoside RT <sub>5</sub> /isomer                                 | 65.25 | C <sub>33</sub> H <sub>58</sub> O <sub>14</sub> | 723.3845  | 2.8  | [M-H+HCOO] <sup>-</sup> | 677.3843,397.1417                                        |
| 138 | 3β,16-α-Dihydroxylanosta7,9(11),24-trien-21-oic acid                            | 65.91 | C <sub>30</sub> H <sub>46</sub> O <sub>4</sub>  | 469.3387  | -0.6 | [M-H] <sup>-</sup>      | 469.2580,451.3280,423.3328,407.3376,337.2583             |
| 139 | 6α-Hydroxydehydropachymic acid                                                  | 66.1  | C <sub>33</sub> H <sub>50</sub> O <sub>6</sub>  | 541.3604  | 0.6  | [M-H] <sup>-</sup>      | 523.3494,497.3338,481.3387,445.2669                      |
| 140 | Longicyclene                                                                    | 66.24 | C <sub>15</sub> H <sub>24</sub>                 | 205.1864  | -4.2 | [M+H] <sup>+</sup>      | 163.1480,149.1324,135.1167,121.1010                      |
| 141 | 2S-(2,6-Dimethoxy-4-propenyl-phenoxy)-1-(3,4,5-trimethoxy-phenyl)-propane-1-one | 66.3  | C <sub>23</sub> H <sub>28</sub> O <sub>7</sub>  | 417.1848  | 4.6  | [M+H] <sup>+</sup>      | 385.1643,357.1693,249.1120,221.1171,193.0857,165.0909    |
| 142 | 16α-Hydroxytrametenolic acid                                                    | 66.36 | C <sub>30</sub> H <sub>48</sub> O <sub>4</sub>  | 471.3542  | -1.1 | [M-H] <sup>-</sup>      | 453.3436,425.3482,409.3167,407.3375,337.2581             |
| 143 | Poricoic acid B                                                                 | 66.79 | C <sub>30</sub> H <sub>44</sub> O <sub>5</sub>  | 483.3172  | -2.3 | [M-H] <sup>-</sup>      | 465.3072,439.3275,421.3168,409.2802                      |
| 144 | Poricoic acid E                                                                 | 67.49 | C <sub>32</sub> H <sub>48</sub> O <sub>6</sub>  | 527.3444  | -0.2 | [M-H] <sup>-</sup>      | 509.3339,481.3020,451.3293,409.2819                      |
| 145 | Dehydrotumulosic acid                                                           | 67.64 | C <sub>31</sub> H <sub>48</sub> O <sub>4</sub>  | 483.3169  | -2.9 | [M-H] <sup>-</sup>      | 465.3439,439.3644,409.3533                               |
| 146 | 1,3-Dimethoxy-2-[1-methyl-2-(3,4,5-trimethoxyphenyl)-ethoxy]-5-(1-              | 67.73 | C <sub>23</sub> H <sub>30</sub> O <sub>6</sub>  | 403.2045  | 2.2  | [M-H] <sup>-</sup>      | 235.1327,209.1169,195.1014,181.0857                      |



|     |                                                  |       |                                                |          |      |                    |                                                       |
|-----|--------------------------------------------------|-------|------------------------------------------------|----------|------|--------------------|-------------------------------------------------------|
|     | propenyl-1-yl)-benzene                           |       |                                                |          |      |                    |                                                       |
| 147 | Poricoic acid G                                  | 67.78 | C <sub>30</sub> H <sub>46</sub> O <sub>5</sub> | 485.3369 | 6.2  | [M-H] <sup>-</sup> | 485.2895,441.3799,423.3327,353.2534,337.2583          |
| 148 | Dehydroeburicoic acid                            | 67.84 | C <sub>31</sub> H <sub>47</sub> O <sub>3</sub> | 466.3547 | 6.0  | [M-H] <sup>-</sup> | 423.3242,407.2930,371.2207,353.2102                   |
| 149 | Tumulosic acid                                   | 67.92 | C <sub>31</sub> H <sub>50</sub> O <sub>4</sub> | 485.3673 | -7.6 | [M-H] <sup>-</sup> | 437.3416,423.3364,337.2564                            |
| 150 | Poricoic acid A                                  | 68.1  | C <sub>31</sub> H <sub>46</sub> O <sub>5</sub> | 497.334  | 0.2  | [M-H] <sup>-</sup> | 479.3234,453.3437,423.2978,381.3230,274.1778          |
| 151 | Calacone                                         | 68.11 | C <sub>15</sub> H <sub>24</sub> O              | 221.1824 | 1.4  | [M+H] <sup>+</sup> | 203.1792,160.1200,147.1168,133.1011                   |
| 152 | 25-Hydroxypachymic acid                          | 68.15 | C <sub>33</sub> H <sub>52</sub> O <sub>6</sub> | 453.3746 | -2.2 | [M-H] <sup>-</sup> | 525.3669,481.3389,467.3595,465.3439                   |
| 153 | 26-Hydroxyporicoic acid DM                       | 68.46 | C <sub>32</sub> H <sub>48</sub> O <sub>7</sub> | 543.3363 | 8.0  | [M-H] <sup>-</sup> | 543.9825,525.3645,465.3452,415.2926                   |
| 154 | 3-O-Acetyl-16 $\alpha$ -hydroxytrametenolic acid | 68.52 | C <sub>32</sub> H <sub>50</sub> O <sub>5</sub> | 513.3686 | 6.6  | [M-H] <sup>-</sup> | 495.3139,467.3594,451.3278,417.2858,355.2326,315.2583 |
| 155 | Dehydropachymic acid                             | 68.79 | C <sub>33</sub> H <sub>50</sub> O <sub>5</sub> | 525.3634 | -3.4 | [M-H] <sup>-</sup> | 509.3293,465.3449,447.3328,355.2340,337.2232          |
| 156 | Poricoic acid AE                                 | 69.02 | C <sub>33</sub> H <sub>50</sub> O <sub>5</sub> | 525.3649 | -5.6 | [M-H] <sup>-</sup> | 509.3297,465.3436,447.3328,355.2340,337.2232          |
| 157 | Polyporenic acid C                               | 69.3  | C <sub>31</sub> H <sub>46</sub> O <sub>4</sub> | 483.3364 | -8.5 | [M-H] <sup>-</sup> | 481.3061,463.3488,437.3481,421.3167,403.3057,271.1738 |
| 158 | 3-epidehydrotumulosic acid                       | 69.5  | C <sub>31</sub> H <sub>48</sub> O <sub>4</sub> | 483.3499 | -4.1 | [M-H] <sup>-</sup> | 421.3157,391.2278                                     |
| 159 | 3 $\beta$ -hydroxylanosta-8,24-dien-21-oic acid  | 70.01 | C <sub>30</sub> H <sub>48</sub> O <sub>3</sub> | 455.3561 | -6.8 | [M-H] <sup>-</sup> | 455.1752,297.2416,279.2316                            |
| 160 | 25-hydroxy-3-epitumulosic acid                   | 73.98 | C <sub>31</sub> H <sub>50</sub> O <sub>4</sub> | 485.3657 | -4.3 | [M-H] <sup>-</sup> | 485.2791,423.3316,337.2517                            |

**Table S2 The typical filtered ion, related parameters and the compound identification**

| No. | Identification                        | Filtered ion                                                | CK vs CG |          |         | MK vs MG |          |        |
|-----|---------------------------------------|-------------------------------------------------------------|----------|----------|---------|----------|----------|--------|
|     |                                       |                                                             | VIP      | P        | FC      | VIP      | P        | FC     |
| 1   | Polygalaxanthone VI                   | 493.1367 <sup>#</sup> ,317.064                              | 1.523    | 0.000011 | 1261856 | /        | /        | /      |
| 2   | Polygalaxanthone III                  | 567.1376 <sup>#</sup> ,345.0594,315.0491                    | 1.722    | 0.00182  | 953273  | /        | /        | /      |
| 3   | Ginsenoside Rg <sub>1</sub>           | 845.4909 <sup>#</sup> ,799.4956,637.4409,475.3821           | 2.147    | 0.00017  | 993     | /        | /        | /      |
| 4   | Ginsenoside Re                        | 991.5489 <sup>#</sup> ,783.4943,637.4467,475.3864           | 1.723    | 0.01983  | 200530  | /        | /        | /      |
| 5   | Polygalasaponin XXIX                  | 1397.6189 <sup>#</sup> ,455.3138,425.30354                  | 1.523    | 0.00075  | 146463  | /        | /        | /      |
| 6   | Desacylsenegasaponin B                | 1265.5851 <sup>#</sup> ,1235.5604,455.3139,425.3035         | 1.755    | 0.01113  | 117574  | 1.696    | 0.0322   | 114137 |
| 7   | Tenuifoliose O                        | 1367.4108 <sup>#</sup> ,455.3167,425.3062                   | 1.514    | 0.00143  | 161935  | /        | /        | /      |
| 8   | Polygalasaponin XXII                  | 1235.5778 <sup>#</sup> ,455.3136,425.3033                   | 1.827    | 0.00499  | 684882  | /        | /        | /      |
| 9   | Polygalasaponin XXVIII                | 1103.5304 <sup>#</sup> ,1073.5092,455.3137,425.3034         | 1.525    | 0.022886 | 401914  | /        | /        | /      |
| 10  | Ginsenoside Rb <sub>1</sub>           | 1153.6083 <sup>#</sup> ,945.536,783.4845,621.433,459.3814   | 1.632    | 0.00013  | 1014187 | 1.752    | 0.01455  | 250667 |
| 11  | Ginsenoside Ro                        | 955.4928 <sup>#</sup> ,793.4369,631.3758                    | 1.521    | 0.01016  | 77063   | /        | /        | /      |
| 12  | Ginsenoside Rc                        | 1123.5941 <sup>#</sup> ,945.5347,783.4834,621.4321,459.3809 | 1.647    | 0.00644  | 51631   | 1.756    | 0.0297   | 434656 |
| 13  | Ginsenoside Ra <sub>1</sub>           | 1255.6387 <sup>#</sup> ,1077.5786,783.4869,459.3911         | 1.575    | 0.03339  | 45488   | 1.599    | 0.02493  | 22631  |
| 14  | Ginsenoside Rb <sub>2</sub>           | 1123.5916 <sup>#</sup> ,945.5379,783.4856,621.4367,459.3897 | 2.672    | 0.00019  | 729516  | 1.808    | 0.0403   | 158564 |
| 15  | Ginsenoside Rd                        | 991.5496 <sup>#</sup> ,459.3908                             | 1.687    | 0.01649  | 82118   | 1.687    | 0.0897   | 209284 |
| 16  | 16 $\alpha$ -hydroxytrametenolic acid | 471.3497 <sup>#</sup> ,409.3156,337.2567                    | 2.448    | 0.00074  | 184481  | /        | /        | /      |
| 17  | Poricoic acid B                       | 483.3125 <sup>#</sup> ,465.3675,409.2798                    | 2.049    | 0.00094  | 510906  | 1.687    | 0.029042 | 209175 |
| 18  | Dehydrotumulosic acid                 | 483.3496 <sup>#</sup> ,421.2674,337.25687                   | 2.170    | 0.00116  | 464072  | /        | /        | /      |
| 19  | Tumulosic acid                        | 485.3637 <sup>#</sup> ,437.3489,337.2185                    | 2.264    | 0.0002   | 17088   | 1.755    | 0.082027 | 332532 |
| 20  | Poricoic acid A                       | 497.3287 <sup>#</sup> ,409.2786,381.3687                    | 2.050    | 0.00098  | 118248  | 1.921    | 0.01078  | 279313 |
| 21  | Polyporenic acid C                    | 481.3305 <sup>#</sup> ,437.2965                             | 2.035    | 0.00059  | 132907  | /        | /        | /      |
| 22  | Poricoic acid B isomer                | 483.3123 <sup>#</sup> ,439.5491,255.2367                    | /        | /        | /       | 1.846    | 0.027991 | 415380 |
| 23  | 3-epidehydrotumulosic acid            | 483.3511 <sup>#</sup> ,421.3157,391.3581                    | 1.647    | 0.01506  | 186645  | /        | /        | /      |

|    |                                                               |                                          |       |          |         |       |          |         |
|----|---------------------------------------------------------------|------------------------------------------|-------|----------|---------|-------|----------|---------|
| 24 | 3 $\beta$ -hydroxylanosta-8,24-dien<br>-21-oic acid           | 455.3566 <sup>#</sup> ,279.2346          | 1.675 | 0.00338  | 11537   | /     | /        | /       |
| 25 | Poricoic acid A isomer                                        | 497.3315 <sup>#</sup> ,437.3515          | 1.674 | 0.00111  | 767607  | /     | /        | /       |
| 26 | 25-hydroxy-3-epitumulosic acid                                | 485.3616 <sup>#</sup> ,423.3265,337.2657 | /     | /        | /       | 1.816 | 0.028063 | 812235  |
| 27 | Hydrated ginsenoside Rb <sub>1</sub> (+2H <sub>2</sub> O)     | 1143.6178 <sup>#</sup> ,783.4861         | 2.072 | 0.0001   | 674894  | /     | /        | /       |
| 28 | Oxidated ginsenoside Rb1                                      | 1123.5879 <sup>#</sup> ,478.9265         | 2.402 | 0.000061 | 553404  | /     | /        | /       |
| 29 | Ginsenoside F <sub>2</sub>                                    | 829.4933 <sup>#</sup> ,459.3731          | 1.602 | 0.04796  | 21796   | 1.657 | 0.012941 | 641382  |
| 30 | Dehydrotumulosic acid hydroxylation                           | 499.3442 <sup>#</sup> ,437.3465,421.3068 | 1.826 | 0.00188  | 285709  | /     | /        | /       |
| 31 | Tumulosic acid hydroxylation + Desaturation                   | 499.3412 <sup>#</sup> ,437.3395,421.3419 | 1.614 | 0.00623  | 4078703 | /     | /        | /       |
| 32 | Tumulosic acid hydroxylation                                  | 501.359 <sup>#</sup> ,373.2961           | 1.549 | 0.00113  | 1285076 | /     | /        | /       |
| 33 | Dehydrotumulosic acid hydroxylation                           | 499.3412 <sup>#</sup> ,421.3085          | 1.602 | 0.00027  | 952264  | /     | /        | /       |
| 34 | Hydrated Pachymic acid                                        | 527.3885 <sup>#</sup> ,465.3347          | /     | /        | /       | 1.625 | 0.029665 | 1205430 |
| 35 | Poricoic acid G dehydration + Glycine<br>conjugation          | 524.3406 <sup>#</sup> ,464.3751          | /     | /        | /       | 1.605 | 0.01003  | 904245  |
| 36 | Dehydrotumulosic acid demethylation                           | 469.3342 <sup>#</sup> ,409.3364,337.2647 | 1.866 | 0.00173  | 112797  | /     | /        | /       |
| 37 | 16 $\alpha$ -hydroxytrametenolic acid hydroxylation           | 487.3453 <sup>#</sup> ,469.3647          | 1.633 | 0.00033  | 456381  | /     | /        | /       |
| 38 | Dehydrotumulosic acid Desaturation                            | 481.3349 <sup>#</sup> ,437.3691          | 1.512 | 0.0031   | 338921  | /     | /        | /       |
| 39 | Poricoic acid B Glycine conjugation                           | 540.3297 <sup>#</sup> ,409.3693          | 1.647 | 0.00065  | 68752   | /     | /        | /       |
| 40 | Tumulosic acid demethylation<br>Poricoic acid G dehydration + | 471.3545 <sup>#</sup> ,409.611,375.2657, | 1.605 | 0.02096  | 57006   | 1.825 | 0.079238 | 2778182 |
| 41 | deoxygenation+Desaturation+Glycine<br>conjugation             | 494.3674 <sup>#</sup> ,295.6174          | /     | /        | /       | 1.508 | 0.015229 | 41317   |
| 42 | Poricoic acid G Oxidation+Glycine conjugation                 | 540.3269 <sup>#</sup> ,481.2657          | /     | /        | /       | 1.829 | 0.01988  | 372061  |
| 43 | Oxidated pachymic acid                                        | 525.3539 <sup>#</sup> ,481.3564,465.6214 | /     | /        | /       | 1.792 | 0.00297  | 701676  |
| 44 | Dehydrotumulosic acetylation                                  | 525.3567 <sup>#</sup> ,465.3664          | /     | /        | /       | 1.792 | 0.029327 | 701676  |
| 45 | Poricoic acid G deoxidation (-2O)                             | 453.3361 <sup>#</sup> ,323.2647          | 1.563 | 0.00024  | 3743413 | 1.734 | 0.010993 | 4701453 |

#. The ions in red whose VIP values are in “VIP” columns

**Table S3 The compound library of KXS**

| No. | Compound                             | Formula                                        | Measured mass<br>(m/z) | Origin   |
|-----|--------------------------------------|------------------------------------------------|------------------------|----------|
| 1   | Lactic acid                          | C <sub>3</sub> H <sub>6</sub> O <sub>3</sub>   | 89.0239                | Polygala |
| 2   | Malonic acid                         | C <sub>3</sub> H <sub>4</sub> O <sub>4</sub>   | 103.0032               | Polygala |
| 3   | Glyceric acid                        | C <sub>3</sub> H <sub>6</sub> O <sub>4</sub>   | 105.0188               | Polygala |
| 4   | Fumaric acid                         | C <sub>4</sub> H <sub>4</sub> O <sub>4</sub>   | 115.0032               | Polygala |
| 5   | Succinic acid                        | C <sub>4</sub> H <sub>6</sub> O <sub>4</sub>   | 117.0188               | Polygala |
| 6   | Glutaric acid                        | C <sub>5</sub> H <sub>8</sub> O <sub>4</sub>   | 131.0345               | Polygala |
| 7   | Malic acid                           | C <sub>4</sub> H <sub>6</sub> O <sub>5</sub>   | 133.0137               | Polygala |
| 8   | Salicylic Acid                       | C <sub>7</sub> H <sub>6</sub> O <sub>3</sub>   | 137.0251               | Ginseng  |
| 9   | Adipic acid                          | C <sub>6</sub> H <sub>10</sub> O <sub>4</sub>  | 145.0501               | Polygala |
| 10  | Hexanedioic acid                     | C <sub>6</sub> H <sub>10</sub> O <sub>4</sub>  | 145.0501               | Polygala |
| 11  | Xylose                               | C <sub>5</sub> H <sub>10</sub> O <sub>5</sub>  | 149.045                | Polygala |
| 12  | Arabinose                            | C <sub>5</sub> H <sub>10</sub> O <sub>5</sub>  | 149.045                | Polygala |
| 13  | Apiose                               | C <sub>5</sub> H <sub>10</sub> O <sub>5</sub>  | 149.045                | Polygala |
| 14  | Fucose                               | C <sub>6</sub> H <sub>12</sub> O <sub>5</sub>  | 163.0607               | Polygala |
| 15  | Rhamnose                             | C <sub>6</sub> H <sub>12</sub> O <sub>5</sub>  | 163.0607               | Polygala |
| 16  | Arabic acid                          | C <sub>5</sub> H <sub>10</sub> O <sub>6</sub>  | 165.0399               | Polygala |
| 17  | Glucose                              | C <sub>6</sub> H <sub>12</sub> O <sub>6</sub>  | 179.0556               | Polygala |
| 18  | Fructose                             | C <sub>6</sub> H <sub>12</sub> O <sub>6</sub>  | 179.0556               | Polygala |
| 19  | Galactose                            | C <sub>6</sub> H <sub>12</sub> O <sub>6</sub>  | 179.0556               | Polygala |
| 20  | Citric acid                          | C <sub>6</sub> H <sub>8</sub> O <sub>7</sub>   | 191.0192               | Polygala |
| 21  | Citric Acid                          | C <sub>6</sub> H <sub>8</sub> O <sub>7</sub>   | 191.0194               | Ginseng  |
| 22  | Quinic acid                          | C <sub>7</sub> H <sub>12</sub> O <sub>6</sub>  | 191.0556               | Polygala |
| 23  | Ferulic acid                         | C <sub>10</sub> H <sub>10</sub> O <sub>4</sub> | 193.0501               | Polygala |
| 24  | Gluconic acid                        | C <sub>6</sub> H <sub>12</sub> O <sub>7</sub>  | 195.0505               | Polygala |
| 25  | Heptopyranose                        | C <sub>7</sub> H <sub>14</sub> O <sub>7</sub>  | 209.0662               | Polygala |
| 26  | Vanillactic acid                     | C <sub>10</sub> H <sub>12</sub> O <sub>5</sub> | 211.0607               | Polygala |
| 27  | Sinapinic acid                       | C <sub>11</sub> H <sub>12</sub> O <sub>5</sub> | 223.0607               | Polygala |
| 28  | Euxanthone                           | C <sub>13</sub> H <sub>8</sub> O <sub>4</sub>  | 227.0345               | Polygala |
| 29  | 1,3-Dihydroxyxanthone                | C <sub>13</sub> H <sub>8</sub> O <sub>4</sub>  | 227.0345               | Polygala |
| 30  | 1,7-Dihydroxyxanthone                | C <sub>13</sub> H <sub>8</sub> O <sub>4</sub>  | 227.0345               | Polygala |
| 31  | 7-Hydroxy-1-methoxyxanthone          | C <sub>14</sub> H <sub>10</sub> O <sub>4</sub> | 241.0501               | Polygala |
| 32  | 1,3-Dihydroxy-2-methylxanthone       | C <sub>14</sub> H <sub>10</sub> O <sub>4</sub> | 241.0501               | Polygala |
| 33  | 1,2,8-Trihydroxyxanthone             | C <sub>13</sub> H <sub>8</sub> O <sub>5</sub>  | 243.0294               | Polygala |
| 34  | 1,3,6-Trihydroxyxanthone             | C <sub>13</sub> H <sub>8</sub> O <sub>5</sub>  | 243.0294               | Polygala |
| 35  | Gentitein                            | C <sub>13</sub> H <sub>8</sub> O <sub>5</sub>  | 243.0294               | Polygala |
| 36  | 1-Hydroxy-2,3-methylenedioxyxanthone | C <sub>14</sub> H <sub>8</sub> O <sub>5</sub>  | 255.0294               | Polygala |
| 37  | 1,7-Dimethoxyxanthone                | C <sub>15</sub> H <sub>12</sub> O <sub>4</sub> | 255.0658               | Polygala |
| 38  | 7-Hydroxy-1,2-dimethoxyxanthone      | C <sub>14</sub> H <sub>10</sub> O <sub>5</sub> | 257.045                | Polygala |
| 39  | 7-Hydroxy-1,3-dimethoxyxanthone      | C <sub>14</sub> H <sub>10</sub> O <sub>5</sub> | 257.045                | Polygala |
| 40  | 1,3-Dihydroxy-2-methoxyxanthone      | C <sub>14</sub> H <sub>10</sub> O <sub>5</sub> | 257.045                | Polygala |
| 41  | 1,3-Dihydroxy-7-methoxyxanthone      | C <sub>14</sub> H <sub>10</sub> O <sub>5</sub> | 257.045                | Polygala |

|    |                                                |                                                |          |          |
|----|------------------------------------------------|------------------------------------------------|----------|----------|
| 42 | 1,7-Dihydroxy-3-methoxyxanthone                | C <sub>14</sub> H <sub>10</sub> O <sub>5</sub> | 257.045  | Polygala |
| 43 | 1,7-Dihydroxy-4-methoxyxanthone                | C <sub>14</sub> H <sub>10</sub> O <sub>5</sub> | 257.045  | Polygala |
| 44 | 2,7-Hydroxy-1-dimethoxyxanthone                | C <sub>14</sub> H <sub>10</sub> O <sub>5</sub> | 257.045  | Polygala |
| 45 | Alpestriose A                                  | C <sub>15</sub> H <sub>16</sub> O <sub>4</sub> | 259.0971 | Polygala |
| 46 | 1-Methoxy-2,3-methylenedioxyxanthone           | C <sub>15</sub> H <sub>10</sub> O <sub>5</sub> | 269.045  | Polygala |
| 47 | 1,7-Dihydroxy-2,3-methylenedioxyxanthone       | C <sub>14</sub> H <sub>8</sub> O <sub>6</sub>  | 271.0243 | Polygala |
| 48 | 1,4-Dihydroxy-6,7-methylenedioxyxanthone       | C <sub>14</sub> H <sub>8</sub> O <sub>6</sub>  | 271.0243 | Polygala |
| 49 | 4,7-Dihydroxy-2,3-methylenedioxyxanthone       | C <sub>14</sub> H <sub>8</sub> O <sub>6</sub>  | 271.0243 | Polygala |
| 50 | 1-Hydroxy-2,3-dimethoxyxanthone                | C <sub>15</sub> H <sub>12</sub> O <sub>5</sub> | 271.0607 | Polygala |
| 51 | 1-Hydroxy-2,4-dimethoxyxanthone                | C <sub>15</sub> H <sub>12</sub> O <sub>5</sub> | 271.0607 | Polygala |
| 52 | 1-Hydroxy-3,7-dimethoxyxanthone                | C <sub>15</sub> H <sub>12</sub> O <sub>5</sub> | 271.0607 | Polygala |
| 53 | 2-Hydroxy-3,4-dimethoxyxanthone                | C <sub>15</sub> H <sub>12</sub> O <sub>5</sub> | 271.0607 | Polygala |
| 54 | 3-Hydroxy-1,2-dimethoxyxanthone                | C <sub>15</sub> H <sub>12</sub> O <sub>5</sub> | 271.0607 | Polygala |
| 55 | 3-Hydroxy-1,4-dimethoxyxanthone                | C <sub>15</sub> H <sub>12</sub> O <sub>5</sub> | 271.0607 | Polygala |
| 56 | 3-Hydroxy-2,8-dimethoxyxanthone                | C <sub>15</sub> H <sub>12</sub> O <sub>5</sub> | 271.0607 | Polygala |
| 57 | 1,3,7-Trihydroxy-2-methoxyxanthone             | C <sub>14</sub> H <sub>10</sub> O <sub>6</sub> | 273.0399 | Polygala |
| 58 | 1,2,7-Trihydroxy-3-methoxyxanthone             | C <sub>14</sub> H <sub>10</sub> O <sub>6</sub> | 273.0399 | Polygala |
| 59 | 1,4,7-Trihydroxy-3-methoxyxanthone             | C <sub>14</sub> H <sub>10</sub> O <sub>6</sub> | 273.0399 | Polygala |
| 60 | 1-Hydroxy-5-methoxy-2,3-methylenedioxyxanthone | C <sub>15</sub> H <sub>10</sub> O <sub>6</sub> | 285.0399 | Polygala |
| 61 | 6-Hydroxy-1-methoxy-2,3-methylenedioxyxanthone | C <sub>15</sub> H <sub>10</sub> O <sub>6</sub> | 285.0399 | Polygala |
| 62 | 7-Hydroxy-1-methoxy-2,3-methylenedioxyxanthone | C <sub>15</sub> H <sub>10</sub> O <sub>6</sub> | 285.0399 | Polygala |
| 63 | 1,2,3-Trimethoxyxanthone                       | C <sub>16</sub> H <sub>14</sub> O <sub>5</sub> | 285.0763 | Polygala |
| 64 | 1,6,8-Trihydroxy-2,3-methylenedioxyxanthone    | C <sub>14</sub> H <sub>8</sub> O <sub>7</sub>  | 287.0192 | Polygala |
| 65 | 1,5-Dihydroxy-2,3-dimethoxyxanthone            | C <sub>15</sub> H <sub>12</sub> O <sub>6</sub> | 287.0556 | Polygala |
| 66 | 1,6-Dihydroxy-3,7-dimethoxyxanthone            | C <sub>15</sub> H <sub>12</sub> O <sub>6</sub> | 287.0556 | Polygala |
| 67 | 1,7-Dihydroxy-2,3-dimethoxyxanthone            | C <sub>15</sub> H <sub>12</sub> O <sub>6</sub> | 287.0556 | Polygala |
| 68 | 1,7-Dihydroxy-3,4-dimethoxyxanthone            | C <sub>15</sub> H <sub>12</sub> O <sub>6</sub> | 287.0556 | Polygala |
| 69 | 1,8-Dihydroxy-2,7-dimethoxyxanthone            | C <sub>15</sub> H <sub>12</sub> O <sub>6</sub> | 287.0556 | Polygala |
| 70 | 2,6-Dihydroxy-1,5-dimethoxyxanthone            | C <sub>15</sub> H <sub>12</sub> O <sub>6</sub> | 287.0556 | Polygala |
| 71 | 3,7-Dihydroxy-1, 2-dimethoxyxanthone           | C <sub>15</sub> H <sub>12</sub> O <sub>6</sub> | 287.0556 | Polygala |
| 72 | 3,8-Dihydroxy-1,2-dimethoxyxanthone            | C <sub>15</sub> H <sub>12</sub> O <sub>6</sub> | 287.0556 | Polygala |
| 73 | 1-Hydroxy-2,3,6,7-bimethylenedioxyxanthone     | C <sub>15</sub> H <sub>8</sub> O <sub>7</sub>  | 299.0192 | Polygala |
| 74 | 1,4-Dimethoxy-2,3-methylenedioxyxanthone       | C <sub>16</sub> H <sub>12</sub> O <sub>6</sub> | 299.0556 | Polygala |
| 75 | 1,7-Dimethoxy-2,3-methylenedioxyxanthone       | C <sub>16</sub> H <sub>12</sub> O <sub>6</sub> | 299.0556 | Polygala |
| 76 | 1,8-Dimethoxy-2,3-methylenedioxyxanthone       | C <sub>16</sub> H <sub>12</sub> O <sub>6</sub> | 299.0556 | Polygala |
| 77 | 1-Hydroxy-3,6,7-trimethoxyxanthone             | C <sub>16</sub> H <sub>14</sub> O <sub>6</sub> | 301.0712 | Polygala |
| 78 | 2-Hydroxy-1,6,7-trimethoxyxanthone             | C <sub>16</sub> H <sub>14</sub> O <sub>6</sub> | 301.0712 | Polygala |
| 79 | 3-Hydroxy-1,2,7-trimethoxyxanthone             | C <sub>16</sub> H <sub>14</sub> O <sub>6</sub> | 301.0712 | Polygala |
| 80 | Onjixanthone I                                 | C <sub>16</sub> H <sub>14</sub> O <sub>6</sub> | 301.0712 | Polygala |

|     |                                                        |                                                 |           |            |
|-----|--------------------------------------------------------|-------------------------------------------------|-----------|------------|
| 81  | Onjixanthone II                                        | C <sub>15</sub> H <sub>12</sub> O <sub>7</sub>  | 303.0505  | Polygala   |
| 82  | 1,3,7-Trihydroxy-2,6-dimethoxyxanthone                 | C <sub>15</sub> H <sub>12</sub> O <sub>7</sub>  | 303.0505  | Polygala   |
| 83  | 1,3,8-Trihydroxy-2,6-dimethoxyxanthone                 | C <sub>15</sub> H <sub>12</sub> O <sub>7</sub>  | 303.0505  | Polygala   |
| 84  | 1,6,7-Trihydroxy-2,3-dimethoxyxanthone                 | C <sub>15</sub> H <sub>12</sub> O <sub>7</sub>  | 303.0505  | Polygala   |
| 85  | 1-Methoxy-2,3,6,7-bimethylenedioxyxanthone             | C <sub>16</sub> H <sub>10</sub> O <sub>7</sub>  | 313.0349  | Polygala   |
| 86  | 2-Hydroxy-1,3-dimethoxy-7,8-methylenedioxyxanthone     | C <sub>16</sub> H <sub>12</sub> O <sub>7</sub>  | 315.0505  | Polygala   |
| 87  | 1,2,3,7-Tetramethoxyxanthone                           | C <sub>17</sub> H <sub>16</sub> O <sub>6</sub>  | 315.0869  | Polygala   |
| 88  | 1,3,6,7-Tetramethoxyxanthone                           | C <sub>17</sub> H <sub>16</sub> O <sub>6</sub>  | 315.0869  | Polygala   |
| 89  | 1,6,8-Trihydroxy-7-methoxy-2,3-methylenedioxyxanthone  | C <sub>15</sub> H <sub>10</sub> O <sub>8</sub>  | 317.0298  | Polygala   |
| 90  | 1,3-Dihydroxy-2,4,7-trimethoxyxanthone                 | C <sub>16</sub> H <sub>14</sub> O <sub>7</sub>  | 317.0662  | Polygala   |
| 91  | 1,3-Dihydroxy-5,6,7-trimethoxyxanthone                 | C <sub>16</sub> H <sub>14</sub> O <sub>7</sub>  | 317.0662  | Polygala   |
| 92  | 1,6-Dihydroxy-3,5,7-trimethoxyxanthone                 | C <sub>16</sub> H <sub>14</sub> O <sub>7</sub>  | 317.0662  | Polygala   |
| 93  | 1,7-Dihydroxy-2,3,4-trimethoxyxanthone                 | C <sub>16</sub> H <sub>14</sub> O <sub>7</sub>  | 317.0662  | Polygala   |
| 94  | 1,7-Dihydroxy-3,5,6-trimethoxyxanthone                 | C <sub>16</sub> H <sub>14</sub> O <sub>7</sub>  | 317.0662  | Polygala   |
| 95  | 3,6-Dihydroxy-1,2,7-trimethoxyxanthone                 | C <sub>16</sub> H <sub>14</sub> O <sub>7</sub>  | 317.0662  | Polygala   |
| 96  | 3,6-Dihydroxy-1,2,8-trimethoxyxanthone                 | C <sub>16</sub> H <sub>14</sub> O <sub>7</sub>  | 317.0662  | Polygala   |
| 97  | 3,8-Dihydroxy-1,2,6-trimethoxyxanthone                 | C <sub>16</sub> H <sub>14</sub> O <sub>7</sub>  | 317.0662  | Polygala   |
| 98  | 6,8-Dihydroxy-1,2,3-trimethoxyxanthone                 | C <sub>16</sub> H <sub>14</sub> O <sub>7</sub>  | 317.0662  | Polygala   |
| 99  | 6,8-Dihydroxy-1,2,4-trimethoxyxanthone                 | C <sub>16</sub> H <sub>14</sub> O <sub>7</sub>  | 317.0662  | Polygala   |
| 100 | 1,3,6,8-Tetrahydroxy-2,7-dimethoxyxanthone             | C <sub>15</sub> H <sub>12</sub> O <sub>8</sub>  | 319.0454  | Polygala   |
| 101 | Polygalaxanthone A                                     | C <sub>17</sub> H <sub>14</sub> O <sub>7</sub>  | 329.0662  | Polygala   |
| 102 | 1,2,3-Trimethoxy-7,8-methylenedioxyxanthone            | C <sub>17</sub> H <sub>14</sub> O <sub>7</sub>  | 329.0662  | Polygala   |
| 103 | 1,6-Dihydroxy-7,8-dimethoxy-2,3-methylenedioxyxanthone | C <sub>16</sub> H <sub>12</sub> O <sub>8</sub>  | 331.0454  | Polygala   |
| 104 | 6-Hydroxy-1,2,3,7-tetramethoxyxanthone                 | C <sub>17</sub> H <sub>16</sub> O <sub>7</sub>  | 331.0818  | Polygala   |
| 105 | 7-Hydroxy-1,2,3,4-tetramethoxyxanthone                 | C <sub>17</sub> H <sub>16</sub> O <sub>7</sub>  | 331.0818  | Polygala   |
| 106 | 1,3,6-Trihydroxy-2,7,8-trimethoxyxanthone              | C <sub>16</sub> H <sub>14</sub> O <sub>8</sub>  | 333.0611  | Polygala   |
| 107 | Sucrose                                                | C <sub>12</sub> H <sub>22</sub> O <sub>11</sub> | 341.1084  | Polygala   |
| 108 | cis-Coniferin                                          | C <sub>16</sub> H <sub>22</sub> O <sub>8</sub>  | 341.1237  | Polygala   |
| 109 | Polygalaxanthone B                                     | C <sub>18</sub> H <sub>18</sub> O <sub>7</sub>  | 345.0975  | Polygala   |
| 110 | 1,2,3,6,7-Pentamethoxyxanthone                         | C <sub>18</sub> H <sub>18</sub> O <sub>7</sub>  | 345.0975  | Polygala   |
| 111 | 1,2,3,7,8-Pentamethoxyxanthone                         | C <sub>18</sub> H <sub>18</sub> O <sub>7</sub>  | 345.0975  | Polygala   |
| 112 | 1,3-Dihydroxy-2,5,6,7-tetramethoxyxanthone             | C <sub>17</sub> H <sub>16</sub> O <sub>8</sub>  | 347.0767  | Polygala   |
| 113 | 3,6-Dihydroxy-1,2,7,8-tetramethoxyxanthone             | C <sub>17</sub> H <sub>16</sub> O <sub>8</sub>  | 347.0767  | Polygala   |
| 114 | pregn-7-ene-2β,3α,15α,20(S)-tetra                      | C <sub>21</sub> H <sub>34</sub> O <sub>4</sub>  | 349.23843 | Poriacocos |
| 115 | 3-Hydroxy-1,2,5,6,7-pentamethoxyxanthone               | C <sub>18</sub> H <sub>18</sub> O <sub>8</sub>  | 361.0924  | Polygala   |
| 116 | Syringin                                               | C <sub>17</sub> H <sub>24</sub> O <sub>9</sub>  | 371.1342  | Polygala   |
| 117 | 1,2,3,4,6,7-Hexamethoxyxanthone                        | C <sub>19</sub> H <sub>20</sub> O <sub>8</sub>  | 375.108   | Polygala   |
| 118 | Tenuifoliside D                                        | C <sub>18</sub> H <sub>24</sub> O <sub>9</sub>  | 383.1342  | Polygala   |
| 119 | Wubangzicide B                                         | C <sub>19</sub> H <sub>18</sub> O <sub>9</sub>  | 389.0873  | Polygala   |

|     |                                                                      |                                                 |            |            |
|-----|----------------------------------------------------------------------|-------------------------------------------------|------------|------------|
| 120 | ergosta-4,22-dien-3-one                                              | C <sub>28</sub> H <sub>44</sub> O               | 395.33193  | Poriacocos |
| 121 | ergosta-5,7,22-trien-3 $\beta$ -ol                                   | C <sub>28</sub> H <sub>44</sub> O               | 395.331939 | Poriacocos |
| 122 | ergosta-7,22-dien-3-one                                              | C <sub>28</sub> H <sub>44</sub> O               | 395.331939 | Poriacocos |
| 123 | ergosta-7,22-dien-3 $\beta$ -ol                                      | C <sub>28</sub> H <sub>46</sub> O               | 397.3475   | Poriacocos |
| 124 | ergosta-7-en-3 $\beta$ -ol                                           | C <sub>28</sub> H <sub>48</sub> O               | 399.36323  | Poriacocos |
| 125 | Wattersiixanthone B                                                  | C <sub>20</sub> H <sub>20</sub> O <sub>9</sub>  | 403.1029   | Polygala   |
| 126 | Neolancerin                                                          | C <sub>19</sub> H <sub>18</sub> O <sub>10</sub> | 405.0822   | Polygala   |
| 127 | Lancerin                                                             | C <sub>19</sub> H <sub>18</sub> O <sub>10</sub> | 405.0822   | Polygala   |
| 128 | 6,9-epoxy-ergosta-7,22-dien-3 $\beta$ -ol                            | C <sub>28</sub> H <sub>44</sub> O <sub>2</sub>  | 411.3268   | Poriacocos |
| 129 | ergosta-5,6-epoxy-7,22-dien-3-ol                                     | C <sub>28</sub> H <sub>44</sub> O <sub>2</sub>  | 411.326853 | Poriacocos |
| 130 | stigmasterol                                                         | C <sub>29</sub> H <sub>48</sub> O               | 411.36323  | Poriacocos |
| 131 | $\beta$ -sitosterol                                                  | C <sub>29</sub> H <sub>50</sub> O               | 413.378889 | Poriacocos |
| 132 | 1-Glucosyloxy-2,3-methylenedioxyxanthone                             | C <sub>20</sub> H <sub>18</sub> O <sub>10</sub> | 417.0822   | Polygala   |
| 133 | 1-Glucosyloxy-2-hydroxy-3-methoxyxanthone                            | C <sub>20</sub> H <sub>20</sub> O <sub>10</sub> | 419.0978   | Polygala   |
| 134 | Mangiferin                                                           | C <sub>19</sub> H <sub>18</sub> O <sub>11</sub> | 421.0771   | Polygala   |
| 135 | Isomangiferin                                                        | C <sub>19</sub> H <sub>18</sub> O <sub>11</sub> | 421.0771   | Polygala   |
| 136 | Guazijinxanthone                                                     | C <sub>24</sub> H <sub>24</sub> O <sub>7</sub>  | 423.1444   | Polygala   |
| 137 | 9,11-dehydroergosta peroxide                                         | C <sub>28</sub> H <sub>42</sub> O <sub>3</sub>  | 425.30611  | Poriacocos |
| 138 | lupeol                                                               | C <sub>30</sub> H <sub>50</sub> O"              | 425.3788   | Poriacocos |
| 139 | 3 $\beta$ ,5 $\alpha$ ,9 $\alpha$ -trihydroxyergosta-7,22-dien-6-one | C <sub>28</sub> H <sub>44</sub> O <sub>3</sub>  | 427.3217   | Poriacocos |
| 140 | ergosta-6,22-dien-5 $\alpha$ ,8 $\alpha$ -epidioxy-3-ol              | C <sub>28</sub> H <sub>44</sub> O <sub>3</sub>  | 427.3217   | Poriacocos |
| 141 | 3 $\beta$ ,5 $\alpha$ -dihydroxyergosta-7,22-dien-6-one              | C <sub>28</sub> H <sub>44</sub> O <sub>3</sub>  | 427.32176  | Poriacocos |
| 142 | Polygalatenoside A                                                   | C <sub>19</sub> H <sub>26</sub> O <sub>11</sub> | 429.1397   | Polygala   |
| 143 | Polygalatenoside B                                                   | C <sub>19</sub> H <sub>26</sub> O <sub>11</sub> | 429.1397   | Polygala   |
| 144 | Polygalatenoside C                                                   | C <sub>19</sub> H <sub>26</sub> O <sub>11</sub> | 429.1397   | Polygala   |
| 145 | cerevisterol                                                         | C <sub>28</sub> H <sub>46</sub> O <sub>3</sub>  | 429.337418 | Poriacocos |
| 146 | Tricornoside E                                                       | C <sub>20</sub> H <sub>20</sub> O <sub>11</sub> | 435.0928   | Polygala   |
| 147 | 4-C- $\beta$ -Glucopyranosyl-1,3,6-trihydroxy-7-methoxyxanthone      | C <sub>20</sub> H <sub>20</sub> O <sub>11</sub> | 435.0928   | Polygala   |
| 148 | 7-O-methoxymangiferin                                                | C <sub>20</sub> H <sub>20</sub> O <sub>11</sub> | 435.0928   | Polygala   |
| 149 | 6-O-benzoylsucrose                                                   | C <sub>19</sub> H <sub>26</sub> O <sub>12</sub> | 445.1346   | Polygala   |
| 150 | Canthoside A                                                         | C <sub>19</sub> H <sub>26</sub> O <sub>12</sub> | 445.1346   | Polygala   |
| 151 | Sibiricaxanthone C                                                   | C <sub>21</sub> H <sub>22</sub> O <sub>11</sub> | 449.1084   | Polygala   |
| 152 | Polyhongkongenoside B                                                | C <sub>21</sub> H <sub>22</sub> O <sub>11</sub> | 449.1084   | Polygala   |
| 153 | porilactone B                                                        | C <sub>30</sub> H <sub>44</sub> O <sub>3</sub>  | 451.3217   | Poriacocos |
| 154 | porilactone A                                                        | C <sub>30</sub> H <sub>44</sub> O <sub>3</sub>  | 451.32176  | Poriacocos |
| 155 | Dehydrotrametenolic acid                                             | C <sub>30</sub> H <sub>46</sub> O <sub>3</sub>  | 453.3351   | Poriacocos |
| 156 | 3 $\beta$ -Hydroxylanosta-7,9(11),24-trien-21-oic acid               | C <sub>30</sub> H <sub>46</sub> O <sub>3</sub>  | 453.3372   | Poriacocos |
| 157 | Pinicolic acid                                                       | C <sub>30</sub> H <sub>46</sub> O <sub>3</sub>  | 453.3669   | Poriacocos |
| 158 | oleanolic acid                                                       | C <sub>30</sub> H <sub>48</sub> O <sub>3</sub>  | 455.353    | Poriacocos |
| 159 | trametenolic acid                                                    | C <sub>30</sub> H <sub>48</sub> O <sub>3</sub>  | 455.353    | Poriacocos |
| 160 | ursolic acid                                                         | C <sub>30</sub> H <sub>48</sub> O <sub>3</sub>  | 455.35306  | Poriacocos |



|     |                                                                           |                                                  |            |            |
|-----|---------------------------------------------------------------------------|--------------------------------------------------|------------|------------|
| 161 | Sibiricose A3                                                             | C <sub>19</sub> H <sub>26</sub> O <sub>13</sub>  | 461.1295   | Polygala   |
| 162 | daedaleanic acid E                                                        | C <sub>30</sub> H <sub>42</sub> O <sub>4</sub>   | 465.301033 | Poriacocos |
| 163 | 3-Oxo-16 $\alpha$ -hydroxylanosta-7,9(11),24-trien-<br>n-21-oic acid      | C <sub>30</sub> H <sub>44</sub> O <sub>4</sub>   | 467.3158   | Poriacocos |
| 164 | 16-deoxyporicoic acid B                                                   | C <sub>30</sub> H <sub>44</sub> O <sub>4</sub>   | 467.31668  | Poriacocos |
| 165 | dehydroeburiconic acid                                                    | C <sub>31</sub> H <sub>48</sub> O <sub>3</sub>   | 467.35306  | Poriacocos |
| 166 | $\beta$ -amyrin acetate                                                   | C <sub>32</sub> H <sub>52</sub> O <sub>2</sub> " | 467.3894   | Poriacocos |
| 167 | $\alpha$ -amyrin acetate                                                  | C <sub>32</sub> H <sub>52</sub> O <sub>2</sub>   | 467.38945  | Poriacocos |
| 168 | 16 $\alpha$ -Hydroxy-3-oxolanosta-8,24-dien-21-oic<br>acid                | C <sub>30</sub> H <sub>46</sub> O <sub>4</sub>   | 469.3304   | Poriacocos |
| 169 | 3 $\alpha$ ,16 $\beta$ -Dihydroxylanosta-7,9(11),24-trien-<br>21-oic acid | C <sub>30</sub> H <sub>46</sub> O <sub>4</sub>   | 469.3316   | Poriacocos |
| 170 | Poriacosones B                                                            | C <sub>30</sub> H <sub>46</sub> O <sub>4</sub>   | 469.33194  | Poriacocos |
| 171 | 16 $\alpha$ -hydroxydehydrotrametenolic acid                              | C <sub>30</sub> H <sub>46</sub> O <sub>4</sub> " | 469.3323   | Poriacocos |
| 172 | 3 $\alpha$ ,16 $\beta$ -Dihydroxylanosta-7,9(11),24-trien-<br>21-oic acid | C <sub>30</sub> H <sub>46</sub> O <sub>4</sub>   | 469.3328   | Poriacocos |
| 173 | 3 $\alpha$ ,16 $\beta$ -Dihydroxylanosta-7,9(11),24-trien-2<br>1-oic acid | C <sub>30</sub> H <sub>46</sub> O <sub>4</sub>   | 469.3332   | Poriacocos |
| 174 | Pinicolic acid E                                                          | C <sub>30</sub> H <sub>46</sub> O <sub>4</sub>   | 469.3332   | Poriacocos |
| 175 | eburicoic acid                                                            | C <sub>31</sub> H <sub>50</sub> O <sub>3</sub>   | 469.73     | Poriacocos |
| 176 | Hederagenin                                                               | C <sub>30</sub> H <sub>48</sub> O <sub>4</sub>   | 471.3475   | Polygala   |
| 177 | 16 $\alpha$ -hydroxytrametenolic acid                                     | C <sub>30</sub> H <sub>48</sub> O <sub>4</sub>   | 471.34798  | Poriacocos |
| 178 | Polygalatenoside D                                                        | C <sub>20</sub> H <sub>28</sub> O <sub>13</sub>  | 475.1452   | Polygala   |
| 179 | daedaleanic acid F                                                        | C <sub>31</sub> H <sub>42</sub> O <sub>4</sub>   | 477.30103  | Poriacocos |
| 180 | 3-Oxo-16 $\alpha$ -hydroxylanosta-7,9(11),24-trien-<br>n-21-oic acid      | C <sub>31</sub> H <sub>44</sub> O <sub>4</sub>   | 479.316    | Poriacocos |
| 181 | daedaleanic acid D                                                        | C <sub>31</sub> H <sub>44</sub> O <sub>4</sub>   | 479.31668  | Poriacocos |
| 182 | poricoic acid C                                                           | C <sub>31</sub> H <sub>46</sub> O <sub>4</sub>   | 481.33233  | Poriacocos |
| 183 | polyporenic acid C                                                        | C <sub>31</sub> H <sub>46</sub> O <sub>4</sub>   | 481.7      | Poriacocos |
| 184 | 6,16 $\alpha$ -Dihydroxydehydrotrametenonic acid                          | C <sub>30</sub> H <sub>44</sub> O <sub>5</sub>   | 483.3101   | Poriacocos |
| 185 | 3,24Dioxo16 $\alpha$ hydroxylanosta7,9(11)<br>dien21oic acid              | C <sub>30</sub> H <sub>44</sub> O <sub>5</sub>   | 483.3112   | Poriacocos |
| 186 | 16-Hydroxy-3,24-dioxolanosta-7,9(11)-dien-<br>21-oic acid                 | C <sub>30</sub> H <sub>44</sub> O <sub>5</sub>   | 483.31131  | Poriacocos |
| 187 | poricoic acid B                                                           | C <sub>30</sub> H <sub>44</sub> O <sub>5</sub>   | 483.31159  | Poriacocos |
| 188 | 15 $\alpha$ -Hydroxyeburiconic acid                                       | C <sub>31</sub> H <sub>48</sub> O <sub>4</sub>   | 483.3468   | Poriacocos |
| 189 | 3-epi-dehydrotumulosic acid                                               | C <sub>31</sub> H <sub>48</sub> O <sub>4</sub> " | 483.3479   | Poriacocos |
| 190 | dehydrotumulosic acid                                                     | C <sub>31</sub> H <sub>48</sub> O <sub>4</sub>   | 483.34798  | Poriacocos |
| 191 | 16 $\alpha$ ,27-Dihydroxydehydrotrametenonic acid                         | C <sub>30</sub> H <sub>46</sub> O <sub>5</sub>   | 485.3258   | Poriacocos |
| 192 | Poriacosone B                                                             | C <sub>30</sub> H <sub>46</sub> O <sub>5</sub>   | 485.3265   | Poriacocos |
| 193 | Poriacosone A                                                             | C <sub>30</sub> H <sub>46</sub> O <sub>5</sub>   | 485.327    | Poriacocos |
| 194 | 3-O-Acetyl-16 $\alpha$ -hydroxytrametenolic acid                          | C <sub>30</sub> H <sub>46</sub> O <sub>5</sub>   | 485.3273   | Poriacocos |
| 195 | Tumulosic acid                                                            | C <sub>31</sub> H <sub>50</sub> O <sub>4</sub>   | 485.3636   | Poriacocos |
| 196 | 16 $\alpha$ -hydroxyeburicoic acid                                        | C <sub>31</sub> H <sub>50</sub> O <sub>4</sub>   | 485.36363  | Poriacocos |

|     |                                                                                   |                                                 |            |            |
|-----|-----------------------------------------------------------------------------------|-------------------------------------------------|------------|------------|
| 197 | 25-hydroxy-3-epitumulosic acid                                                    | C <sub>31</sub> H <sub>50</sub> O <sub>4</sub>  | 485.36363  | Poriacocos |
| 198 | Hispidic acid B                                                                   | C <sub>31</sub> H <sub>50</sub> O <sub>4</sub>  | 485.3643   | Poriacocos |
| 199 | poricoic acid G                                                                   | C <sub>30</sub> H <sub>46</sub> O <sub>5</sub>  | 485.68     | Poriacocos |
| 200 | Polygalic acid                                                                    | C <sub>29</sub> H <sub>44</sub> O <sub>6</sub>  | 487.306    | Polygala   |
| 201 | Daedaleanic acid B                                                                | C <sub>30</sub> H <sub>48</sub> O <sub>5</sub>  | 487.3415   | Poriacocos |
| 202 | 3 $\alpha$ ,16 $\alpha$ ,26-Trihydroxylanosta-8,24dien-21-oic acid                | C <sub>30</sub> H <sub>48</sub> O <sub>5</sub>  | 487.34299  | Poriacocos |
| 203 | Polygalaxanthone VI                                                               | C <sub>23</sub> H <sub>26</sub> O <sub>12</sub> | 493.1346   | Polygala   |
| 204 | 3 $\beta$ -Acetoxylanosta-7,9(11),24-trien-21-oic acid                            | C <sub>32</sub> H <sub>48</sub> O <sub>4</sub>  | 495.3462   | Poriacocos |
| 205 | poricoic acid CM                                                                  | C <sub>32</sub> H <sub>48</sub> O <sub>4</sub>  | 495.34798  | Poriacocos |
| 206 | 6,16 $\alpha$ -Dihydroxydehydroeburiconic acid                                    | C <sub>31</sub> H <sub>46</sub> O <sub>5</sub>  | 497.3263   | Poriacocos |
| 207 | 25-hydroxypolyporenic acid C                                                      | C <sub>31</sub> H <sub>46</sub> O <sub>5</sub>  | 497.32724  | Poriacocos |
| 208 | 29-hydroxypolyporenic acid C                                                      | C <sub>31</sub> H <sub>46</sub> O <sub>5</sub>  | 497.32724  | Poriacocos |
| 209 | poricoic acid A                                                                   | C <sub>31</sub> H <sub>46</sub> O <sub>5</sub>  | 497.32724  | Poriacocos |
| 210 | poricoic acid BM                                                                  | C <sub>31</sub> H <sub>46</sub> O <sub>5</sub>  | 497.32724  | Poriacocos |
| 211 | 6,7-dehydroporicoic acid H                                                        | C <sub>31</sub> H <sub>46</sub> O <sub>5</sub>  | 497.327247 | Poriacocos |
| 212 | 16 $\alpha$ ,25-Dihydroxydehydroeburiconic acid                                   | C <sub>31</sub> H <sub>46</sub> O <sub>5</sub>  | 497.3273   | Poriacocos |
| 213 | 3 $\alpha$ -Acetoxylanosta-8,24-dien-21-oic acid                                  | C <sub>32</sub> H <sub>46</sub> O <sub>4</sub>  | 497.3622   | Poriacocos |
| 214 | 3-O-formyleburicoic acid                                                          | C <sub>32</sub> H <sub>50</sub> O <sub>4</sub>  | 497.36363  | Poriacocos |
| 215 | oleanolic acid 3-O-acetate                                                        | C <sub>32</sub> H <sub>50</sub> O <sub>4</sub>  | 497.36363  | Poriacocos |
| 216 | 6 $\alpha$ -hydroxypolyporenic acid C                                             | C <sub>31</sub> H <sub>46</sub> O <sub>5</sub>  | 497.69     | Poriacocos |
| 217 | poricoic acid E                                                                   | C <sub>30</sub> H <sub>44</sub> O <sub>6</sub>  | 499.3065   | Poriacocos |
| 218 | 16 $\alpha$ ,25-Dihydroxyeburiconic acid                                          | C <sub>31</sub> H <sub>48</sub> O <sub>5</sub>  | 499.3408   | Poriacocos |
| 219 | 25-Hydroxy-3-epidehydrotumulosic acid                                             | C <sub>31</sub> H <sub>48</sub> O <sub>5</sub>  | 499.3408   | Poriacocos |
| 220 | 16 $\alpha$ ,29-Dihydroxyeburiconic acid                                          | C <sub>31</sub> H <sub>48</sub> O <sub>5</sub>  | 499.3412   | Poriacocos |
| 221 | 3 $\beta$ ,16 $\alpha$ -Dihydroxy-7-oxolanosta-8,24-dien-21-oic acid              | C <sub>31</sub> H <sub>48</sub> O <sub>5</sub>  | 499.3425   | Poriacocos |
| 222 | poricoic acid GM                                                                  | C <sub>31</sub> H <sub>48</sub> O <sub>5</sub>  | 499.3428   | Poriacocos |
| 223 | 15 $\alpha$ -hydroxydehydrotumulosic acid                                         | C <sub>31</sub> H <sub>48</sub> O <sub>5</sub>  | 499.34289  | Poriacocos |
| 224 | 6 $\alpha$ -hydroxydehydrotumulosic acid                                          | C <sub>31</sub> H <sub>48</sub> O <sub>5</sub>  | 499.342897 | Poriacocos |
| 225 | poricoic acid H                                                                   | C <sub>31</sub> H <sub>48</sub> O <sub>5</sub>  | 499.342897 | Poriacocos |
| 226 | 26-hydroxyporicoic acid G                                                         | C <sub>30</sub> H <sub>46</sub> O <sub>6</sub>  | 501.32216  | Poriacocos |
| 227 | pinicolic acid F                                                                  | C <sub>30</sub> H <sub>46</sub> O <sub>6</sub>  | 501.32216  | Poriacocos |
| 228 | 3 $\beta$ ,16 $\alpha$ -Dihydroxy-24-hydroxymethylanosta-7,9(11)-dien-21-oic acid | C <sub>31</sub> H <sub>50</sub> O <sub>5</sub>  | 501.3564   | Poriacocos |
| 229 | 25 $\alpha$ -Hydroxytumulosic acid                                                | C <sub>31</sub> H <sub>50</sub> O <sub>5</sub>  | 501.3572   | Poriacocos |
| 230 | 16 $\alpha$ ,25-dihydroxyeburicoic acid                                           | C <sub>31</sub> H <sub>50</sub> O <sub>5</sub>  | 501.35854  | Poriacocos |
| 231 | Maltotriose                                                                       | C <sub>18</sub> H <sub>32</sub> O <sub>16</sub> | 503.1612   | Polygala   |
| 232 | Polygalatenoside E                                                                | C <sub>22</sub> H <sub>32</sub> O <sub>13</sub> | 503.1765   | Polygala   |
| 233 | Polygalacic acid                                                                  | C <sub>30</sub> H <sub>48</sub> O <sub>6</sub>  | 503.3373   | Polygala   |
| 234 | Poricoic acid CE                                                                  | C <sub>33</sub> H <sub>50</sub> O <sub>4</sub>  | 509.361    | Poriacocos |
| 235 | 3-O-Acetyl-16 $\alpha$ -hydroxydehydrotrametenolic acid                           | C <sub>32</sub> H <sub>48</sub> O <sub>5</sub>  | 511.3423   | Poriacocos |

|     |                                                                                          |                                                 |            |            |
|-----|------------------------------------------------------------------------------------------|-------------------------------------------------|------------|------------|
| 236 | 3 $\beta$ -Hydroxy-16 $\alpha$ -acetoxylanosta-7,9(11),24-trien-21-oic acid              | C <sub>32</sub> H <sub>48</sub> O <sub>5</sub>  | 511.3426   | Poriacocos |
| 237 | poricoic acid AM                                                                         | C <sub>32</sub> H <sub>48</sub> O <sub>5</sub>  | 511.34289  | Poriacocos |
| 238 | acetyleburiac acid                                                                       | C <sub>33</sub> H <sub>52</sub> O <sub>4</sub>  | 511.37928  | Poriacocos |
| 239 | Mazatlanone                                                                              | C <sub>29</sub> H <sub>22</sub> O <sub>9</sub>  | 513.1186   | Polygala   |
| 240 | 5 $\alpha$ ,8 $\alpha$ -Peroxydehydrotumulosic acid                                      | C <sub>31</sub> H <sub>46</sub> O <sub>6</sub>  | 513.3219   | Poriacocos |
| 241 | poricoic acid F                                                                          | C <sub>31</sub> H <sub>46</sub> O <sub>6</sub>  | 513.32216  | Poriacocos |
| 242 | poricoic acid D                                                                          | C <sub>31</sub> H <sub>46</sub> O <sub>6</sub>  | 513.322162 | Poriacocos |
| 243 | poricoic acid I                                                                          | C <sub>31</sub> H <sub>46</sub> O <sub>6</sub>  | 513.322162 | Poriacocos |
| 244 | Poricoic acid GE                                                                         | C <sub>32</sub> H <sub>50</sub> O <sub>5</sub>  | 513.3565   | Poriacocos |
| 245 | poricoic acid HM                                                                         | C <sub>32</sub> H <sub>50</sub> O <sub>5</sub>  | 513.3585   | Poriacocos |
| 246 | 3-O-acetyl-16 $\alpha$ -hydroxytrametenolic acid                                         | C <sub>32</sub> H <sub>50</sub> O <sub>5</sub>  | 513.35854  | Poriacocos |
| 247 | 3-Acetyloxy-16 $\alpha$ -hydroxytrametenolic acid                                        | C <sub>32</sub> H <sub>50</sub> O <sub>5</sub>  | 513.359    | Poriacocos |
| 248 | 5,8 $\alpha$ -Dioxy-3 $\beta$ ,16 $\alpha$ -dihydroxyl-lanost-7(11), 24-dien-21-oic acid | C <sub>31</sub> H <sub>48</sub> O <sub>6</sub>  | 515.3374   | Poriacocos |
| 249 | 25-hydroxyporicoic acid H                                                                | C <sub>31</sub> H <sub>48</sub> O <sub>6</sub>  | 515.3378   | Poriacocos |
| 250 | Arillanin B                                                                              | C <sub>22</sub> H <sub>30</sub> O <sub>14</sub> | 517.1558   | Polygala   |
| 251 | Arillatose B                                                                             | C <sub>22</sub> H <sub>30</sub> O <sub>14</sub> | 517.1558   | Polygala   |
| 252 | Sibiricose A5                                                                            | C <sub>22</sub> H <sub>30</sub> O <sub>14</sub> | 517.1558   | Polygala   |
| 253 | Tenuifolioside A                                                                         | C <sub>22</sub> H <sub>30</sub> O <sub>14</sub> | 517.1558   | Polygala   |
| 254 | Presenegenin                                                                             | C <sub>30</sub> H <sub>46</sub> O <sub>7</sub>  | 517.3166   | Polygala   |
| 255 | Ganoderic acid C2                                                                        | C <sub>30</sub> H <sub>46</sub> O <sub>7</sub>  | 517.31671  | Poriacocos |
| 256 | poricoic acid M                                                                          | C <sub>30</sub> H <sub>46</sub> O <sub>7</sub>  | 517.31707  | Poriacocos |
| 257 | Wubangzicide A                                                                           | C <sub>24</sub> H <sub>26</sub> O <sub>13</sub> | 521.1295   | Polygala   |
| 258 | Tricornoside C                                                                           | C <sub>24</sub> H <sub>26</sub> O <sub>13</sub> | 521.1295   | Polygala   |
| 259 | Tricornoside F                                                                           | C <sub>24</sub> H <sub>26</sub> O <sub>13</sub> | 521.1295   | Polygala   |
| 260 | 16 $\alpha$ -Acetyloxy-24-methylene-3-oxolanosta-7, 9(11)-dien-21-oic acid               | C <sub>33</sub> H <sub>48</sub> O <sub>5</sub>  | 523.3425   | Poriacocos |
| 261 | 3-Oxo-16 $\alpha$ -acetyloxylanosta-7,9(11), 24-trien-21-oic acid                        | C <sub>33</sub> H <sub>48</sub> O <sub>5</sub>  | 523.344    | Poriacocos |
| 262 | 16 $\alpha$ -Acetyloxyeburiconic acid                                                    | C <sub>33</sub> H <sub>50</sub> O <sub>5</sub>  | 525.3565   | Poriacocos |
| 263 | 3-epi-dehydropachymic acid                                                               | C <sub>33</sub> H <sub>50</sub> O <sub>5</sub>  | 525.3585   | Poriacocos |
| 264 | poricoic acid AE                                                                         | C <sub>33</sub> H <sub>50</sub> O <sub>5</sub>  | 525.35854  | Poriacocos |
| 265 | 1-O-methylmazatlanone                                                                    | C <sub>30</sub> H <sub>24</sub> O <sub>9</sub>  | 527.1342   | Polygala   |
| 266 | poricoic acid DM                                                                         | C <sub>32</sub> H <sub>48</sub> O <sub>6</sub>  | 527.3378   | Poriacocos |
| 267 | 25-methoxyporicoic acid A                                                                | C <sub>32</sub> H <sub>48</sub> O <sub>6</sub>  | 527.337812 | Poriacocos |
| 268 | 3-epi-Pachymic acid                                                                      | C <sub>33</sub> H <sub>52</sub> O <sub>5</sub>  | 527.3733   | Poriacocos |
| 269 | Poricoic acid HE                                                                         | C <sub>33</sub> H <sub>52</sub> O <sub>5</sub>  | 527.3739   | Poriacocos |
| 270 | pachymic acid                                                                            | C <sub>33</sub> H <sub>52</sub> O <sub>5</sub>  | 527.76     | Poriacocos |
| 271 | poricoic acid J                                                                          | C <sub>31</sub> H <sub>46</sub> O <sub>7</sub>  | 529.31707  | Poriacocos |
| 272 | poricoic acid L                                                                          | C <sub>31</sub> H <sub>46</sub> O <sub>7</sub>  | 529.31707  | Poriacocos |
| 273 | 3-O-Acetyl-16 $\alpha$ ,26-dihydroxytrametenolic acid                                    | C <sub>32</sub> H <sub>50</sub> O <sub>6</sub>  | 529.35309  | Poriacocos |
| 274 | 3 $\beta$ -Acetoxy-16 $\alpha$ ,26-dihydroxylanosta-8,24-di                              | C <sub>32</sub> H <sub>50</sub> O <sub>6</sub>  | 529.35321  | Poriacocos |

|     |                                                                            |                                                 |            |            |
|-----|----------------------------------------------------------------------------|-------------------------------------------------|------------|------------|
|     | en-21-oic acid                                                             |                                                 |            |            |
| 275 | Tenuifolioside B                                                           | C <sub>23</sub> H <sub>32</sub> O <sub>14</sub> | 531.1714   | Polygala   |
| 276 | Tenuifolioside C                                                           | C <sub>23</sub> H <sub>32</sub> O <sub>14</sub> | 531.1714   | Polygala   |
| 277 | poricoic acid K                                                            | C <sub>31</sub> H <sub>48</sub> O <sub>7</sub>  | 531.33272  | Poriacocos |
| 278 | Polycaudoside A                                                            | C <sub>25</sub> H <sub>28</sub> O <sub>13</sub> | 535.1452   | Polygala   |
| 279 | Tricornoside D                                                             | C <sub>25</sub> H <sub>28</sub> O <sub>13</sub> | 535.1452   | Polygala   |
| 280 | Wattersiixanthone A                                                        | C <sub>25</sub> H <sub>28</sub> O <sub>13</sub> | 535.1452   | Polygala   |
| 281 | Sibiricaxanthone A                                                         | C <sub>24</sub> H <sub>26</sub> O <sub>14</sub> | 537.1245   | Polygala   |
| 282 | Sibiricaxanthone B                                                         | C <sub>24</sub> H <sub>26</sub> O <sub>14</sub> | 537.1245   | Polygala   |
| 283 | 2'-benzoylmangiferin                                                       | C <sub>26</sub> H <sub>22</sub> O <sub>13</sub> | 541.0982   | Polygala   |
| 284 | 6 $\alpha$ -Hydroxydehydropachymic acid                                    | C <sub>33</sub> H <sub>50</sub> O <sub>6</sub>  | 541.35346  | Poriacocos |
| 285 | 29 $\alpha$ -hydroxydehydrotumulosic acid                                  | C <sub>33</sub> H <sub>50</sub> O <sub>6</sub>  | 541.353462 | Poriacocos |
| 286 | 29-Hydroxydehydropachymic acid                                             | C <sub>33</sub> H <sub>50</sub> O <sub>6</sub>  | 541.3537   | Poriacocos |
| 287 | pachymic acid methyl ester                                                 | C <sub>34</sub> H <sub>54</sub> O <sub>5</sub>  | 541.3898   | Poriacocos |
| 288 | 26-hydroxyporicoic acid DM                                                 | C <sub>32</sub> H <sub>48</sub> O <sub>7</sub>  | 543.33272  | Poriacocos |
| 289 | 6 $\alpha$ -Hydroxydehydropachymic acid                                    | C <sub>32</sub> H <sub>48</sub> O <sub>7</sub>  | 543.3332   | Poriacocos |
| 290 | 25-hydroxypachymic acid                                                    | C <sub>33</sub> H <sub>52</sub> O <sub>6</sub>  | 543.36911  | Poriacocos |
| 291 | Arillanin C                                                                | C <sub>23</sub> H <sub>32</sub> O <sub>15</sub> | 547.1663   | Polygala   |
| 292 | Sibiricose A1                                                              | C <sub>23</sub> H <sub>32</sub> O <sub>15</sub> | 547.1663   | Polygala   |
| 293 | Sibiricose A6                                                              | C <sub>23</sub> H <sub>32</sub> O <sub>15</sub> | 547.1663   | Polygala   |
| 294 | 1'-Sinapoylsucrose                                                         | C <sub>23</sub> H <sub>32</sub> O <sub>15</sub> | 547.1663   | Polygala   |
| 295 | Telephiose F                                                               | C <sub>26</sub> H <sub>30</sub> O <sub>13</sub> | 549.1608   | Polygala   |
| 296 | Telephioxanthone A                                                         | C <sub>28</sub> H <sub>24</sub> O <sub>12</sub> | 551.119    | Polygala   |
| 297 | Telephioxanthone B                                                         | C <sub>28</sub> H <sub>24</sub> O <sub>12</sub> | 551.119    | Polygala   |
| 298 | Polygalaxanthone IX                                                        | C <sub>25</sub> H <sub>28</sub> O <sub>14</sub> | 551.1401   | Polygala   |
| 299 | Arillanin E                                                                | C <sub>25</sub> H <sub>28</sub> O <sub>14</sub> | 551.1401   | Polygala   |
| 300 | 7-Methoxy-1-methylmazatlanone                                              | C <sub>31</sub> H <sub>26</sub> O <sub>10</sub> | 557.1448   | Polygala   |
| 301 | 25,26-Dihydroxydehydropachymic acid                                        | C <sub>33</sub> H <sub>50</sub> O <sub>7</sub>  | 557.3481   | Poriacocos |
| 302 | 1'-Acetyl-3'-feruloylsucrose                                               | C <sub>24</sub> H <sub>32</sub> O <sub>15</sub> | 559.1663   | Polygala   |
| 303 | 25-Methoxy-29-hydroxyporicoic acid HM                                      | C <sub>33</sub> H <sub>52</sub> O <sub>7</sub>  | 559.36377  | Poriacocos |
| 304 | Glomeratose A                                                              | C <sub>24</sub> H <sub>34</sub> O <sub>15</sub> | 561.182    | Polygala   |
| 305 | Sibiricose A2                                                              | C <sub>24</sub> H <sub>34</sub> O <sub>15</sub> | 561.182    | Polygala   |
| 306 | Arillanin D                                                                | C <sub>26</sub> H <sub>30</sub> O <sub>14</sub> | 565.1558   | Polygala   |
| 307 | Polygalaxanthone III                                                       | C <sub>25</sub> H <sub>28</sub> O <sub>15</sub> | 567.135    | Polygala   |
| 308 | Polygalaxanthone VIII                                                      | C <sub>25</sub> H <sub>28</sub> O <sub>15</sub> | 567.135    | Polygala   |
| 309 | Polygalaxanthone XI                                                        | C <sub>25</sub> H <sub>28</sub> O <sub>15</sub> | 567.135    | Polygala   |
| 310 | Wubangzicide C                                                             | C <sub>25</sub> H <sub>28</sub> O <sub>15</sub> | 567.135    | Polygala   |
| 311 | 3 $\beta$ ,15 $\alpha$ -Bis(acetyloxy)-24-methylenelanost-8-en-21-oic acid | C <sub>35</sub> H <sub>54</sub> O <sub>6</sub>  | 569.3831   | Poriacocos |
| 312 | 16-O-acetyl-pachymic acid                                                  | C <sub>35</sub> H <sub>54</sub> O <sub>6</sub>  | 569.3857   | Poriacocos |
|     | 5,8 $\alpha$ -Epidioxy-3 $\beta$ -[(2-hydroxyacetyl) oxy]                  |                                                 |            |            |
| 313 | -16-hydroxylanosta-6,9(11),24-trien-21-oic acid                            | C <sub>33</sub> H <sub>48</sub> O <sub>8</sub>  | 571.3281   | Poriacocos |
| 314 | 3 $\beta$ ,16 $\alpha$ -Bis(acetyloxy)-29-hydroxylanosta-8,2               | C <sub>34</sub> H <sub>52</sub> O <sub>7</sub>  | 571.3619   | Poriacocos |

|     |                                                                                             |                                                 |           |            |
|-----|---------------------------------------------------------------------------------------------|-------------------------------------------------|-----------|------------|
|     | 4-dien-21-oic acid                                                                          |                                                 |           |            |
| 315 | $\beta$ -daucosterol                                                                        | C <sub>35</sub> H <sub>60</sub> O <sub>6</sub>  | 575.43171 | Poriacocos |
| 316 | Sibiricaxanthone E                                                                          | C <sub>26</sub> H <sub>28</sub> O <sub>15</sub> | 579.135   | Polygala   |
| 317 | Tricornoside B                                                                              | C <sub>27</sub> H <sub>32</sub> O <sub>14</sub> | 579.1714  | Polygala   |
| 318 | Polyhongkongenoside A                                                                       | C <sub>25</sub> H <sub>26</sub> O <sub>16</sub> | 581.1143  | Polygala   |
| 319 | Polygalaxanthone V                                                                          | C <sub>26</sub> H <sub>30</sub> O <sub>15</sub> | 581.1507  | Polygala   |
| 320 | 3-epi-(3'-o-methyl malonyloxy)<br>-dehydrotumulosic acid                                    | C <sub>35</sub> H <sub>52</sub> O <sub>7</sub>  | 583.3603  | Poriacocos |
| 321 | O-acetylpachymic acid methyl ester                                                          | C <sub>36</sub> H <sub>56</sub> O <sub>6</sub>  | 583.3941  | Poriacocos |
| 322 | 3 $\beta$ - Benzoyldehydrotumulosic acid                                                    | C <sub>38</sub> H <sub>52</sub> O <sub>5</sub>  | 587.374   | Poriacocos |
| 323 | Syringaresinol-4'-O- $\beta$ -D-monoglucoside                                               | C <sub>29</sub> H <sub>38</sub> O <sub>13</sub> | 593.2234  | Polygala   |
| 324 | Polygalaxanthone IV                                                                         | C <sub>27</sub> H <sub>32</sub> O <sub>15</sub> | 595.1663  | Polygala   |
| 325 | Sibiricaxanthone D                                                                          | C <sub>27</sub> H <sub>32</sub> O <sub>15</sub> | 595.1663  | Polygala   |
| 326 | Tricornose A                                                                                | C <sub>26</sub> H <sub>36</sub> O <sub>16</sub> | 603.1925  | Polygala   |
| 327 | 3 $\beta$ -p-Hydroxybenzoyldehydrotumulosic<br>acid                                         | C <sub>38</sub> H <sub>52</sub> O <sub>6</sub>  | 603.3671  | Poriacocos |
| 328 | Polygalaxanthone VII                                                                        | C <sub>27</sub> H <sub>32</sub> O <sub>16</sub> | 611.1612  | Polygala   |
| 329 | 3-epi-(3'-hydroxy-3'-methylglutaryloxy)<br>-16 $\alpha$ -hydroxydehydrotrametenolic acid    | C <sub>36</sub> H <sub>54</sub> O <sub>8</sub>  | 613.3751  | Poriacocos |
| 330 | 3-epi-(3'-Hydroxy-3'-methylglutaryloxy)-16<br>$\alpha$ -hydroxyeburicoic acid               | C <sub>36</sub> H <sub>56</sub> O <sub>8</sub>  | 615.3913  | Poriacocos |
| 331 | Reiniose B                                                                                  | C <sub>29</sub> H <sub>34</sub> O <sub>15</sub> | 621.182   | Polygala   |
| 332 | Reiniose C                                                                                  | C <sub>29</sub> H <sub>34</sub> O <sub>15</sub> | 621.182   | Polygala   |
| 333 | Ginsenoside Rh <sub>2</sub>                                                                 | C <sub>36</sub> H <sub>62</sub> O <sub>8</sub>  | 622.4445  | Ginseng    |
| 334 | 3-epi-(3'-hydroxyl-3'-methylglutaryloxy)<br>-dehydrotumulosic acid                          | C <sub>37</sub> H <sub>56</sub> O <sub>8</sub>  | 627.6017  | Poriacocos |
| 335 | 3-epi-(3'-hydroxyl-3'-methylglutaryloxy)<br>-tumulosic acid                                 | C <sub>37</sub> H <sub>56</sub> O <sub>8</sub>  | 629.4066  | Poriacocos |
| 336 | $\alpha$ -L-Arabinopyranosyl-3 $\beta$ ,23,27,29-tetrahydr<br>oxyolean-12-en-28-oate        | C <sub>35</sub> H <sub>56</sub> O <sub>10</sub> | 635.3795  | Polygala   |
| 337 | Sibiricaxanthone F                                                                          | C <sub>29</sub> H <sub>34</sub> O <sub>16</sub> | 637.1769  | Polygala   |
| 338 | Polygalaxanthone X                                                                          | C <sub>29</sub> H <sub>36</sub> O <sub>16</sub> | 639.1925  | Polygala   |
| 339 | Polygalasaponin XXV                                                                         | C <sub>36</sub> H <sub>56</sub> O <sub>10</sub> | 647.3795  | Polygala   |
| 340 | Fallaxsaponin A                                                                             | C <sub>35</sub> H <sub>54</sub> O <sub>11</sub> | 649.3588  | Polygala   |
| 341 | Bayogenin-3-O- $\beta$ -D-glucopyranoside                                                   | C <sub>36</sub> H <sub>58</sub> O <sub>10</sub> | 649.3952  | Polygala   |
| 342 | 3'-Sinapoyl-6-benzoylsucrose                                                                | C <sub>30</sub> H <sub>36</sub> O <sub>16</sub> | 651.1925  | Polygala   |
| 343 | 3'-(3,4,5-Trimethoxycinnamoyl)-6-benzoylsu<br>crose                                         | C <sub>31</sub> H <sub>38</sub> O <sub>16</sub> | 665.2082  | Polygala   |
| 344 | 3'-(3,4,5-Trimethoxycinnamoyl)-4-benzoylsu<br>crose                                         | C <sub>31</sub> H <sub>38</sub> O <sub>16</sub> | 665.2082  | Polygala   |
| 345 | 29-[O- $\beta$ -D-Glucopyranosyloxy]-3 $\beta$ ,23,27-trih<br>ydroxyolean-12-en-28-oic acid | C <sub>36</sub> H <sub>58</sub> O <sub>11</sub> | 665.3901  | Polygala   |
| 346 | Ginsenoside Rk <sub>3</sub> / Ginsenoside Rh <sub>4</sub>                                   | C <sub>36</sub> H <sub>60</sub> O <sub>8</sub>  | 665.4259  | Ginseng    |
| 347 | Ginsenoside Rk <sub>4</sub>                                                                 | C <sub>36</sub> H <sub>60</sub> O <sub>8</sub>  | 665.4277  | Ginseng    |

|     |                                                                |                                                 |           |          |
|-----|----------------------------------------------------------------|-------------------------------------------------|-----------|----------|
| 348 | Tenuifolside B                                                 | C <sub>30</sub> H <sub>36</sub> O <sub>17</sub> | 667.1874  | Polygala |
| 349 | Compound K                                                     | C <sub>36</sub> H <sub>62</sub> O <sub>8</sub>  | 667.4417  | Ginseng  |
| 350 | Arillatose C                                                   | C <sub>28</sub> H <sub>40</sub> O <sub>19</sub> | 679.2086  | Polygala |
| 351 | Arillatose E                                                   | C <sub>28</sub> H <sub>40</sub> O <sub>19</sub> | 679.2086  | Polygala |
| 352 | Tenuifolin                                                     | C <sub>36</sub> H <sub>56</sub> O <sub>12</sub> | 679.3694  | Polygala |
| 353 | 3'-(3,4,5-Trimethoxycinnamoyl)-4-p-hydroxy<br>benzoylsucrose   | C <sub>31</sub> H <sub>38</sub> O <sub>17</sub> | 681.2031  | Polygala |
| 354 | 1'-O-(3,4,5-trimethoxycinnamoyl)-6-p-hydro<br>xybenzoylsucrose | C <sub>31</sub> H <sub>38</sub> O <sub>17</sub> | 681.2031  | Polygala |
| 355 | Tenuifolside A                                                 | C <sub>31</sub> H <sub>38</sub> O <sub>17</sub> | 681.2031  | Polygala |
| 356 | 20( R)-Ginsenoside Rh <sub>1</sub>                             | C <sub>36</sub> H <sub>62</sub> O <sub>9</sub>  | 683.4365  | Ginseng  |
| 357 | Ginsenoside F <sub>1</sub>                                     | C <sub>36</sub> H <sub>62</sub> O <sub>9</sub>  | 683.4376  | Ginseng  |
| 358 | Ginsenoside Rh <sub>1</sub>                                    | C <sub>36</sub> H <sub>62</sub> O <sub>9</sub>  | 683.4376  | Ginseng  |
| 359 | Glomeratose B                                                  | C <sub>32</sub> H <sub>38</sub> O <sub>17</sub> | 693.2031  | Polygala |
| 360 | 3'-(3,4,5-Trimethoxycinnamoyl)-6-anisoylsuc<br>rose            | C <sub>32</sub> H <sub>40</sub> O <sub>17</sub> | 695.2187  | Polygala |
| 361 | 24( R)-Pseudoginsenoside Rt <sub>5</sub>                       | C <sub>36</sub> H <sub>62</sub> O <sub>10</sub> | 699.4331  | Ginseng  |
| 362 | Glomeratose C                                                  | C <sub>33</sub> H <sub>40</sub> O <sub>17</sub> | 707.2187  | Polygala |
| 363 | Tricornose B                                                   | C <sub>33</sub> H <sub>40</sub> O <sub>17</sub> | 707.2187  | Polygala |
| 364 | Arillatose D                                                   | C <sub>29</sub> H <sub>42</sub> O <sub>20</sub> | 709.2191  | Polygala |
| 365 | Arillatose F                                                   | C <sub>29</sub> H <sub>42</sub> O <sub>20</sub> | 709.2191  | Polygala |
| 366 | Telephiose C                                                   | C <sub>32</sub> H <sub>40</sub> O <sub>18</sub> | 711.2137  | Polygala |
| 367 | 3'-Feruloyl-6-sinapoylsucrose                                  | C <sub>33</sub> H <sub>40</sub> O <sub>18</sub> | 723.2137  | Polygala |
| 368 | Arillanin A                                                    | C <sub>33</sub> H <sub>40</sub> O <sub>18</sub> | 723.2137  | Polygala |
| 369 | 1'-Sinapoyl-3'-feruloylsucrose                                 | C <sub>33</sub> H <sub>40</sub> O <sub>18</sub> | 723.2137  | Polygala |
| 370 | Reiniose A                                                     | C <sub>34</sub> H <sub>42</sub> O <sub>18</sub> | 737.2293  | Polygala |
| 371 | Glomeratose E                                                  | C <sub>34</sub> H <sub>40</sub> O <sub>19</sub> | 751.2086  | Polygala |
| 372 | Arillatose A                                                   | C <sub>34</sub> H <sub>40</sub> O <sub>19</sub> | 751.2086  | Polygala |
| 373 | 3'-O-Sinapoyl-6-4-methyl-3,5-dimethoxycinn<br>amoyl)           | C <sub>35</sub> H <sub>44</sub> O <sub>18</sub> | 751.245   | Polygala |
| 374 | Sibiricose A4                                                  | C <sub>34</sub> H <sub>42</sub> O <sub>19</sub> | 753.2242  | Polygala |
| 375 | Telephiose E                                                   | C <sub>34</sub> H <sub>42</sub> O <sub>19</sub> | 753.2242  | Polygala |
| 376 | 3',6-Disinapoylsucrose                                         | C <sub>34</sub> H <sub>42</sub> O <sub>19</sub> | 753.2242  | Polygala |
| 377 | 3,6'-Disinapoylsucrose                                         | C <sub>34</sub> H <sub>42</sub> O <sub>19</sub> | 753.2242  | Polygala |
| 378 | 1',3'-Disinapoylsucrose                                        | C <sub>34</sub> H <sub>42</sub> O <sub>19</sub> | 753.2242  | Polygala |
| 379 | Pseudo-ginsenoside Rp <sub>1</sub>                             | C <sub>41</sub> H <sub>64</sub> O <sub>13</sub> | 763.42688 | Ginseng  |
| 380 | Gmsenoside F <sub>4</sub> /Rg <sub>4</sub>                     | C <sub>42</sub> H <sub>70</sub> O <sub>12</sub> | 765.476   | Ginseng  |
| 381 | Telephiose G                                                   | C <sub>34</sub> H <sub>40</sub> O <sub>20</sub> | 767.2035  | Polygala |
| 382 | Tenuifolside C                                                 | C <sub>35</sub> H <sub>44</sub> O <sub>19</sub> | 767.2399  | Polygala |
| 383 | Notoginsenoside R <sub>2</sub>                                 | C <sub>41</sub> H <sub>70</sub> O <sub>13</sub> | 769.4746  | Ginseng  |
| 384 | Ginsenoside F <sub>3</sub>                                     | C <sub>41</sub> H <sub>70</sub> O <sub>13</sub> | 769.4749  | Ginseng  |
| 385 | 3',6'-Diferuloyl-4,6-diacetylsucrose                           | C <sub>36</sub> H <sub>42</sub> O <sub>19</sub> | 777.2242  | Polygala |
| 386 | 3',6'-Diferuloyl-3,6-diacetylsucrose                           | C <sub>36</sub> H <sub>44</sub> O <sub>19</sub> | 777.2242  | Polygala |
| 387 | Polygalasaponin XXVII                                          | C <sub>41</sub> H <sub>64</sub> O <sub>14</sub> | 779.4218  | Polygala |

|     |                                                                                                       |                                                 |          |          |
|-----|-------------------------------------------------------------------------------------------------------|-------------------------------------------------|----------|----------|
| 388 | Glomeratose D                                                                                         | C <sub>36</sub> H <sub>46</sub> O <sub>19</sub> | 781.2555 | Polygala |
| 389 | Ginsenoside F <sub>2</sub>                                                                            | C <sub>42</sub> H <sub>72</sub> O <sub>13</sub> | 783.49   | Ginseng  |
| 390 | Pseudoginsenoside RT <sub>2</sub>                                                                     | C <sub>41</sub> H <sub>70</sub> O <sub>14</sub> | 785.4693 | Ginseng  |
| 391 | Zingibroside R <sub>1</sub>                                                                           | C <sub>42</sub> H <sub>66</sub> O <sub>14</sub> | 793.4379 | Ginseng  |
| 392 | Chikusetsusaponin Iva                                                                                 | C <sub>42</sub> H <sub>66</sub> O <sub>14</sub> | 793.4399 | Ginseng  |
| 393 | 3-Acetyl-3',6- <i>O</i> -disinapoylsucrose                                                            | C <sub>36</sub> H <sub>44</sub> O <sub>20</sub> | 795.2348 | Polygala |
| 394 | 4-Acetyl-3',6- <i>O</i> -disinapoylsucrose                                                            | C <sub>36</sub> H <sub>44</sub> O <sub>20</sub> | 795.2348 | Polygala |
| 395 | Telephiose A                                                                                          | C <sub>36</sub> H <sub>44</sub> O <sub>20</sub> | 795.2348 | Polygala |
| 396 | Telephiose B                                                                                          | C <sub>36</sub> H <sub>44</sub> O <sub>20</sub> | 795.2348 | Polygala |
| 397 | Hederagenin 3- <i>O</i> - $\beta$ -D-glucopyranosyl (1 $\rightarrow$ 2)<br>$\beta$ -D-glucopyranoside | C <sub>42</sub> H <sub>68</sub> O <sub>14</sub> | 795.4531 | Polygala |
| 398 | Polygalasaponin XX                                                                                    | C <sub>42</sub> H <sub>68</sub> O <sub>14</sub> | 795.4531 | Polygala |
| 399 | Notoginsenoside T <sub>5</sub>                                                                        | C <sub>41</sub> H <sub>68</sub> O <sub>12</sub> | 797.4683 | Ginseng  |
| 400 | Sibiricaxanthone G                                                                                    | C <sub>35</sub> H <sub>44</sub> O <sub>21</sub> | 799.2297 | Polygala |
| 401 | 3'-Feruloyl-6'-sinapoyl-4,6-diacetylsucrose                                                           | C <sub>37</sub> H <sub>44</sub> O <sub>20</sub> | 807.2348 | Polygala |
| 402 | Ginsenoside Rs <sub>4</sub> /Rs <sub>5</sub>                                                          | C <sub>44</sub> H <sub>72</sub> O <sub>13</sub> | 807.4903 | Ginseng  |
| 403 | Polygalasaponin XII                                                                                   | C <sub>42</sub> H <sub>66</sub> O <sub>15</sub> | 809.4324 | Polygala |
| 404 | Polygalasaponin XIII                                                                                  | C <sub>42</sub> H <sub>66</sub> O <sub>15</sub> | 809.4324 | Polygala |
| 405 | Polygalasaponin XXVI                                                                                  | C <sub>42</sub> H <sub>66</sub> O <sub>15</sub> | 809.4324 | Polygala |
| 406 | Polygalasaponin I                                                                                     | C <sub>42</sub> H <sub>68</sub> O <sub>15</sub> | 811.448  | Polygala |
| 407 | Lobatoside B                                                                                          | C <sub>42</sub> H <sub>68</sub> O <sub>15</sub> | 811.448  | Polygala |
| 408 | Polygalasaponin C                                                                                     | C <sub>42</sub> H <sub>68</sub> O <sub>15</sub> | 811.448  | Polygala |
| 409 | Polygalasaponin D                                                                                     | C <sub>42</sub> H <sub>68</sub> O <sub>15</sub> | 811.448  | Polygala |
| 410 | Ginsenoside Rg <sub>6</sub>                                                                           | C <sub>42</sub> H <sub>70</sub> O <sub>12</sub> | 811.4849 | Ginseng  |
| 411 | Ginsenoside Rg <sub>4</sub>                                                                           | C <sub>42</sub> H <sub>70</sub> O <sub>12</sub> | 811.4852 | Ginseng  |
| 412 | Ginsenoside Rg <sub>5</sub>                                                                           | C <sub>42</sub> H <sub>70</sub> O <sub>12</sub> | 811.4852 | Ginseng  |
| 413 | Ginsenoside Rk <sub>1</sub>                                                                           | C <sub>42</sub> H <sub>70</sub> O <sub>12</sub> | 811.4852 | Ginseng  |
| 414 | Ginsenoside F <sub>4</sub>                                                                            | C <sub>42</sub> H <sub>70</sub> O <sub>12</sub> | 811.4865 | Ginseng  |
| 415 | Ginsenoside F <sub>3</sub>                                                                            | C <sub>41</sub> H <sub>70</sub> O <sub>13</sub> | 815.4788 | Ginseng  |
| 416 | Ginsenoside F <sub>5</sub>                                                                            | C <sub>41</sub> H <sub>70</sub> O <sub>13</sub> | 815.4788 | Ginseng  |
| 417 | Pseudoginsenoside RT <sub>3</sub>                                                                     | C <sub>41</sub> H <sub>70</sub> O <sub>13</sub> | 815.4788 | Ginseng  |
| 418 | Compound II                                                                                           | C <sub>41</sub> H <sub>70</sub> O <sub>13</sub> | 815.479  | Ginseng  |
| 419 | Floralginsenoside B                                                                                   | C <sub>42</sub> H <sub>72</sub> O <sub>15</sub> | 815.4798 | Ginseng  |
| 420 | 20(R)-Notoginsenoside R <sub>2</sub>                                                                  | C <sub>41</sub> H <sub>70</sub> O <sub>13</sub> | 815.481  | Ginseng  |
| 421 | Sanchinoside A3                                                                                       | C <sub>41</sub> H <sub>70</sub> O <sub>13</sub> | 815.4819 | Ginseng  |
| 422 | Majonoside R <sub>1</sub> /isomer                                                                     | C <sub>42</sub> H <sub>72</sub> O <sub>15</sub> | 816.4818 | Ginseng  |
| 423 | Dalmaiose A                                                                                           | C <sub>38</sub> H <sub>46</sub> O <sub>20</sub> | 821.2504 | Polygala |
| 424 | Ginsenoside Rs <sub>3</sub>                                                                           | C <sub>44</sub> H <sub>74</sub> O <sub>14</sub> | 825.5012 | Ginseng  |
| 425 | Ginsenoside Rg <sub>10</sub> / Ginsenoside Rg <sub>9</sub>                                            | C <sub>42</sub> H <sub>70</sub> O <sub>13</sub> | 827.4788 | Ginseng  |
| 426 | 20(R)-Ginsenoside Rg <sub>2</sub>                                                                     | C <sub>42</sub> H <sub>72</sub> O <sub>13</sub> | 829.4944 | Ginseng  |
| 427 | Gmsenoside F <sub>2</sub>                                                                             | C <sub>42</sub> H <sub>72</sub> O <sub>13</sub> | 829.4962 | Ginseng  |
| 428 | 20(R)-Ginsenoside Rg <sub>3</sub>                                                                     | C <sub>42</sub> H <sub>72</sub> O <sub>13</sub> | 829.4965 | Ginseng  |
| 429 | Ginsenoside Rg <sub>2</sub>                                                                           | C <sub>42</sub> H <sub>72</sub> O <sub>13</sub> | 829.4966 | Ginseng  |
| 430 | Telephiose D                                                                                          | C <sub>38</sub> H <sub>46</sub> O <sub>21</sub> | 837.2454 | Polygala |

|     |                                               |                                                 |           |          |
|-----|-----------------------------------------------|-------------------------------------------------|-----------|----------|
| 431 | Reinioside A                                  | C <sub>42</sub> H <sub>66</sub> O <sub>17</sub> | 841.4222  | Polygala |
| 432 | Notoginsenoside Rt                            | C <sub>44</sub> H <sub>74</sub> O <sub>15</sub> | 841.49591 | Ginseng  |
| 433 | Ginsenoside Rf                                | C <sub>42</sub> H <sub>72</sub> O <sub>14</sub> | 845.4815  | Ginseng  |
| 434 | Ginsenoside Rg <sub>1</sub>                   | C <sub>42</sub> H <sub>72</sub> O <sub>14</sub> | 845.4893  | Ginseng  |
| 435 | Pseudoginsenoside F <sub>11</sub>             | C <sub>42</sub> H <sub>72</sub> O <sub>14</sub> | 845.4904  | Ginseng  |
| 436 | Butenyl group- Rf                             | C <sub>46</sub> H <sub>76</sub> O <sub>15</sub> | 868.5179  | Ginseng  |
| 437 | Butenyl group- Rg <sub>1</sub>                | C <sub>46</sub> H <sub>76</sub> O <sub>15</sub> | 868.5179  | Ginseng  |
| 438 | Reiniose D                                    | C <sub>42</sub> H <sub>48</sub> O <sub>20</sub> | 871.2661  | Polygala |
| 439 | Ginsenoside Rs <sub>3</sub>                   | C <sub>44</sub> H <sub>74</sub> O <sub>14</sub> | 871.505   | Ginseng  |
| 440 | Reiniose E                                    | C <sub>39</sub> H <sub>50</sub> O <sub>23</sub> | 885.2665  | Polygala |
| 441 | Notoginsenoside Rt                            | C <sub>44</sub> H <sub>74</sub> O <sub>15</sub> | 887.4988  | Ginseng  |
| 442 | 4'-O-acetyl-pseudoginsenoside F <sub>11</sub> | C <sub>44</sub> H <sub>74</sub> O <sub>15</sub> | 887.4999  | Ginseng  |
| 443 | 6'-O-acetyl-ginsenoside Rg <sub>1</sub>       | C <sub>44</sub> H <sub>74</sub> O <sub>15</sub> | 887.4999  | Ginseng  |
| 444 | Tenuifolioside E                              | C <sub>41</sub> H <sub>48</sub> O <sub>22</sub> | 891.2559  | Polygala |
| 445 | Reiniose F                                    | C <sub>40</sub> H <sub>52</sub> O <sub>24</sub> | 915.2771  | Polygala |
| 446 | Tricornose D                                  | C <sub>40</sub> H <sub>52</sub> O <sub>24</sub> | 915.2771  | Polygala |
| 447 | Pseudoginsenoside Rt <sub>1</sub>             | C <sub>47</sub> H <sub>74</sub> O <sub>18</sub> | 925.4783  | Ginseng  |
| 448 | Chikusetsusaponin Iv                          | C <sub>47</sub> H <sub>74</sub> O <sub>18</sub> | 925.4795  | Ginseng  |
| 449 | Polygalasaponin A                             | C <sub>47</sub> H <sub>76</sub> O <sub>18</sub> | 927.4954  | Polygala |
| 450 | Tricornose C                                  | C <sub>41</sub> H <sub>54</sub> O <sub>24</sub> | 929.2927  | Polygala |
| 451 | Ginsenoside Re <sub>4</sub>                   | C <sub>47</sub> H <sub>80</sub> O <sub>18</sub> | 931.5267  | Ginseng  |
| 452 | Notoginsenoside R <sub>1</sub>                | C <sub>47</sub> H <sub>80</sub> O <sub>18</sub> | 931.52692 | Ginseng  |
| 453 | Polygalasaponin E                             | C <sub>47</sub> H <sub>74</sub> O <sub>19</sub> | 941.4746  | Polygala |
| 454 | Ginsenoside Rd                                | C <sub>48</sub> H <sub>82</sub> O <sub>18</sub> | 945.5399  | Ginseng  |
| 455 | Ginsenoside Re                                | C <sub>48</sub> H <sub>82</sub> O <sub>18</sub> | 945.5448  | Ginseng  |
| 456 | Gypenoside XVII                               | C <sub>48</sub> H <sub>82</sub> O <sub>18</sub> | 946.5501  | Ginseng  |
| 457 | Ginsenoside Ro                                | C <sub>48</sub> H <sub>76</sub> O <sub>19</sub> | 955.4917  | Ginseng  |
| 458 | Polygalasaponin II                            | C <sub>48</sub> H <sub>78</sub> O <sub>19</sub> | 957.5059  | Polygala |
| 459 | Ginsenoside Re <sub>2</sub>                   | C <sub>48</sub> H <sub>82</sub> O <sub>19</sub> | 961.5347  | Ginseng  |
| 460 | Ginsenoside Re <sub>3</sub>                   | C <sub>48</sub> H <sub>82</sub> O <sub>19</sub> | 961.5347  | Ginseng  |
| 461 | Ginsenoside Re <sub>1</sub>                   | C <sub>48</sub> H <sub>82</sub> O <sub>19</sub> | 961.5358  | Ginseng  |
| 462 | 20-glc-Rf                                     | C <sub>48</sub> H <sub>82</sub> O <sub>19</sub> | 962.5385  | Ginseng  |
| 463 | Compound Mc <sub>1</sub>                      | C <sub>47</sub> H <sub>80</sub> O <sub>17</sub> | 962.545   | Ginseng  |
| 464 | Gypenoside IX                                 | C <sub>47</sub> H <sub>80</sub> O <sub>17</sub> | 962.545   | Ginseng  |
| 465 | Notoginsenoside N <sub>1</sub> /isomer        | C <sub>48</sub> H <sub>82</sub> O <sub>19</sub> | 962.545   | Ginseng  |
| 466 | Polygalasaponin XLVIII                        | C <sub>48</sub> H <sub>76</sub> O <sub>20</sub> | 971.4852  | Polygala |
| 467 | Polygalasaponin XIV                           | C <sub>48</sub> H <sub>76</sub> O <sub>20</sub> | 971.4852  | Polygala |
| 468 | Polygalasaponin XLVII                         | C <sub>48</sub> H <sub>76</sub> O <sub>20</sub> | 971.4852  | Polygala |
| 469 | Polygalasaponin VI                            | C <sub>48</sub> H <sub>78</sub> O <sub>20</sub> | 973.5008  | Polygala |
| 470 | Polygalasaponin B                             | C <sub>48</sub> H <sub>78</sub> O <sub>20</sub> | 973.5008  | Polygala |
| 471 | Notoginsenoside Fp <sub>1</sub>               | C <sub>47</sub> H <sub>80</sub> O <sub>18</sub> | 977.53284 | Ginseng  |
| 472 | Pseudoginsenoside Rc <sub>1</sub>             | C <sub>50</sub> H <sub>84</sub> O <sub>19</sub> | 988.5607  | Ginseng  |
| 473 | Gypenoside XVII                               | C <sub>48</sub> H <sub>82</sub> O <sub>18</sub> | 991.5472  | Ginseng  |
| 474 | Notoginsenoside K                             | C <sub>48</sub> H <sub>82</sub> O <sub>18</sub> | 991.5504  | Ginseng  |



|     |                                           |                                                 |            |          |
|-----|-------------------------------------------|-------------------------------------------------|------------|----------|
| 475 | 20-O-Glucosylginsenoside Rf               | C <sub>48</sub> H <sub>82</sub> O <sub>19</sub> | 1007.5408  | Ginseng  |
| 476 | Notoginsenoside R <sub>3</sub>            | C <sub>48</sub> H <sub>82</sub> O <sub>19</sub> | 1007.5421  | Ginseng  |
| 477 | Notoginsenoside N                         | C <sub>48</sub> H <sub>82</sub> O <sub>19</sub> | 1007.54279 | Ginseng  |
| 478 | VInaginsenoside R <sub>4</sub>            | C <sub>48</sub> H <sub>82</sub> O <sub>19</sub> | 1007.5456  | Ginseng  |
| 479 | Bu-Gypenoside XVII                        | C <sub>52</sub> H <sub>86</sub> O <sub>19</sub> | 1014.5757  | Ginseng  |
| 480 | Butenyl group -Rd                         | C <sub>52</sub> H <sub>86</sub> O <sub>19</sub> | 1014.5757  | Ginseng  |
| 481 | Butenyl group - Re                        | C <sub>52</sub> H <sub>86</sub> O <sub>19</sub> | 1014.5758  | Ginseng  |
| 482 | Malonyl-floralginsenoside Re <sub>1</sub> | C <sub>51</sub> H <sub>84</sub> O <sub>21</sub> | 1031.54321 | Ginseng  |
| 483 | Malonyl-ginsenoside XDII                  | C <sub>51</sub> H <sub>84</sub> O <sub>21</sub> | 1031.54346 | Ginseng  |
| 484 | Malonyl-ginsenoside Rd                    | C <sub>51</sub> H <sub>84</sub> O <sub>21</sub> | 1031.5435  | Ginseng  |
| 485 | Malonyl-ginsenoside Re                    | C <sub>51</sub> H <sub>84</sub> O <sub>21</sub> | 1031.5437  | Ginseng  |
| 486 | Malonyl-Floralginsenoside Rd <sub>5</sub> | C <sub>51</sub> H <sub>84</sub> O <sub>21</sub> | 1031.5453  | Ginseng  |
| 487 | Fallaxose A                               | C <sub>48</sub> H <sub>58</sub> O <sub>25</sub> | 1033.3189  | Polygala |
| 488 | Polygalasaponin G                         | C <sub>52</sub> H <sub>84</sub> O <sub>22</sub> | 1059.5376  | Polygala |
| 489 | Polygalasaponin J                         | C <sub>52</sub> H <sub>82</sub> O <sub>23</sub> | 1073.5169  | Polygala |
| 490 | Fallaxose B                               | C <sub>50</sub> H <sub>60</sub> O <sub>26</sub> | 1075.3295  | Polygala |
| 491 | Watterose D                               | C <sub>49</sub> H <sub>58</sub> O <sub>27</sub> | 1077.3087  | Polygala |
| 492 | Watterose I                               | C <sub>49</sub> H <sub>58</sub> O <sub>27</sub> | 1077.3087  | Polygala |
| 493 | Tricornose G                              | C <sub>46</sub> H <sub>62</sub> O <sub>29</sub> | 1077.3299  | Polygala |
| 494 | Ginsenoside Rc                            | C <sub>53</sub> H <sub>90</sub> O <sub>22</sub> | 1077.5833  | Ginseng  |
| 495 | Ginsenoside Rb <sub>3</sub>               | C <sub>53</sub> H <sub>90</sub> O <sub>22</sub> | 1077.5838  | Ginseng  |
| 496 | Ginsenoside Rb <sub>2</sub>               | C <sub>53</sub> H <sub>90</sub> O <sub>22</sub> | 1077.5839  | Ginseng  |
| 497 | Polygalasaponin III                       | C <sub>53</sub> H <sub>86</sub> O <sub>23</sub> | 1089.5482  | Polygala |
| 498 | Polygalasaponin F                         | C <sub>53</sub> H <sub>86</sub> O <sub>23</sub> | 1089.5482  | Polygala |
| 499 | Notoginsenoside O/P                       | C <sub>52</sub> H <sub>88</sub> O <sub>21</sub> | 1093.5813  | Ginseng  |
| 500 | Polygalasaponin XXIII                     | C <sub>53</sub> H <sub>82</sub> O <sub>24</sub> | 1101.5118  | Polygala |
| 501 | Crotalarioside A                          | C <sub>53</sub> H <sub>82</sub> O <sub>24</sub> | 1101.5118  | Polygala |
| 502 | Amarelloside                              | C <sub>51</sub> H <sub>60</sub> O <sub>27</sub> | 1103.3244  | Polygala |
| 503 | Fallaxose C                               | C <sub>51</sub> H <sub>60</sub> O <sub>27</sub> | 1103.3244  | Polygala |
| 504 | Watterose H                               | C <sub>51</sub> H <sub>60</sub> O <sub>27</sub> | 1103.3244  | Polygala |
| 505 | Polygalasaponin XXVIII                    | C <sub>53</sub> H <sub>84</sub> O <sub>24</sub> | 1103.5275  | Polygala |
| 506 | Polygalasaponin XXI                       | C <sub>53</sub> H <sub>84</sub> O <sub>24</sub> | 1103.5275  | Polygala |
| 507 | Tricornose F                              | C <sub>51</sub> H <sub>62</sub> O <sub>27</sub> | 1105.34    | Polygala |
| 508 | Ginsenoside Rb <sub>1</sub>               | C <sub>54</sub> H <sub>92</sub> O <sub>23</sub> | 1107.5957  | Ginseng  |
| 509 | Polygalasaponin XVII                      | C <sub>54</sub> H <sub>86</sub> O <sub>24</sub> | 1117.5431  | Polygala |
| 510 | Ginsenoside Roa                           | C <sub>54</sub> O <sub>86</sub> O <sub>24</sub> | 1117.54382 | Ginseng  |
| 511 | Watterose C                               | C <sub>51</sub> H <sub>60</sub> O <sub>28</sub> | 1119.3193  | Polygala |
| 512 | Polygalasaponin VII                       | C <sub>54</sub> H <sub>88</sub> O <sub>24</sub> | 1119.5588  | Polygala |
| 513 | Ginsenoside Rs <sub>2</sub>               | C <sub>55</sub> H <sub>92</sub> O <sub>23</sub> | 1119.5955  | Ginseng  |
| 514 | Ginsenoside Rs <sub>1</sub>               | C <sub>55</sub> H <sub>92</sub> O <sub>23</sub> | 1119.5973  | Ginseng  |
| 515 | Ginsenoside Rb <sub>2</sub>               | C <sub>53</sub> H <sub>90</sub> O <sub>22</sub> | 1123.5895  | Ginseng  |
| 516 | Ginsenoside Rb <sub>3</sub>               | C <sub>53</sub> H <sub>90</sub> O <sub>22</sub> | 1123.5895  | Ginseng  |
| 517 | Notoginsenoside A/ isomer                 | C <sub>54</sub> H <sub>92</sub> O <sub>24</sub> | 1124.5979  | Ginseng  |
| 518 | Fallaxose D                               | C <sub>52</sub> H <sub>62</sub> O <sub>28</sub> | 1133.335   | Polygala |

|     |                                                                                                                   |                                                 |            |          |
|-----|-------------------------------------------------------------------------------------------------------------------|-------------------------------------------------|------------|----------|
| 519 | Watterose A                                                                                                       | C <sub>52</sub> H <sub>62</sub> O <sub>28</sub> | 1133.335   | Polygala |
| 520 | Onjisaponin I                                                                                                     | C <sub>54</sub> H <sub>86</sub> O <sub>25</sub> | 1133.538   | Polygala |
| 521 | Polygalasaponin XV                                                                                                | C <sub>54</sub> H <sub>86</sub> O <sub>25</sub> | 1133.538   | Polygala |
| 522 | Watterose J                                                                                                       | C <sub>51</sub> H <sub>60</sub> O <sub>29</sub> | 1135.3142  | Polygala |
| 523 | Tricornose E                                                                                                      | C <sub>52</sub> H <sub>64</sub> O <sub>28</sub> | 1135.3506  | Polygala |
| 524 | Polygalasaponin XI                                                                                                | C <sub>54</sub> H <sub>88</sub> O <sub>25</sub> | 1135.5537  | Polygala |
| 525 | Notoginsenoside C                                                                                                 | C <sub>54</sub> H <sub>92</sub> O <sub>25</sub> | 1139.58301 | Ginseng  |
| 526 | Reiniose G                                                                                                        | C <sub>53</sub> H <sub>62</sub> O <sub>28</sub> | 1145.335   | Polygala |
| 527 | Polygalasaponin XXXIII                                                                                            | C <sub>55</sub> H <sub>86</sub> O <sub>25</sub> | 1145.538   | Polygala |
| 528 | ginsenoside Ra <sub>7</sub>                                                                                       | C <sub>57</sub> H <sub>94</sub> O <sub>23</sub> | 1146.618   | Ginseng  |
| 529 | ginsenoside Ra <sub>8</sub> /Ra <sub>9</sub>                                                                      | C <sub>57</sub> H <sub>94</sub> O <sub>23</sub> | 1146.618   | Ginseng  |
| 530 | Watterose F                                                                                                       | C <sub>52</sub> H <sub>62</sub> O <sub>29</sub> | 1149.3299  | Polygala |
| 531 | Quinquenoside R <sub>1</sub>                                                                                      | C <sub>56</sub> H <sub>94</sub> O <sub>24</sub> | 1150.6135  | Ginseng  |
| 532 | 5,6-Didehydroginsenoside Rb <sub>1</sub>                                                                          | C <sub>54</sub> H <sub>90</sub> O <sub>23</sub> | 1151.5861  | Ginseng  |
| 533 | Ginsenoside Rb <sub>1</sub>                                                                                       | C <sub>54</sub> H <sub>92</sub> O <sub>23</sub> | 1153.6031  | Ginseng  |
| 534 | Watterose B                                                                                                       | C <sub>53</sub> H <sub>62</sub> O <sub>29</sub> | 1161.3299  | Polygala |
| 535 | Senegose G                                                                                                        | C <sub>53</sub> H <sub>64</sub> O <sub>29</sub> | 1163.3455  | Polygala |
| 536 | Senegose H                                                                                                        | C <sub>53</sub> H <sub>64</sub> O <sub>29</sub> | 1163.3455  | Polygala |
| 537 | Malonyl-ginsenoside Rb <sub>2</sub>                                                                               | C <sub>56</sub> H <sub>92</sub> O <sub>25</sub> | 1163.58484 | Ginseng  |
| 538 | Malonyl-ginsenoside Rc                                                                                            | C <sub>56</sub> H <sub>92</sub> O <sub>25</sub> | 1163.58484 | Ginseng  |
| 539 | Malonyl-Rb <sub>3</sub>                                                                                           | C <sub>56</sub> H <sub>92</sub> O <sub>25</sub> | 1164.5928  | Ginseng  |
| 540 | Glomeratose F                                                                                                     | C <sub>54</sub> H <sub>64</sub> O <sub>29</sub> | 1175.3455  | Polygala |
| 541 | Reiniose H                                                                                                        | C <sub>54</sub> H <sub>64</sub> O <sub>29</sub> | 1175.3455  | Polygala |
| 542 | ginsenoside Ra <sub>6</sub>                                                                                       | C <sub>58</sub> H <sub>96</sub> O <sub>24</sub> | 1176.6075  | Ginseng  |
| 543 | Watterose G                                                                                                       | C <sub>53</sub> H <sub>62</sub> O <sub>30</sub> | 1177.3248  | Polygala |
| 544 | Arilloside A                                                                                                      | C <sub>57</sub> H <sub>88</sub> O <sub>26</sub> | 1187.5486  | Polygala |
| 545 | Watterose E                                                                                                       | C <sub>54</sub> H <sub>64</sub> O <sub>30</sub> | 1191.3404  | Polygala |
| 546 | Malonyl-Ginsenoside Rb <sub>1</sub>                                                                               | C <sub>57</sub> H <sub>94</sub> O <sub>26</sub> | 1193.5999  | Ginseng  |
| 547 | Quinquenoside R <sub>1</sub>                                                                                      | C <sub>56</sub> H <sub>94</sub> O <sub>24</sub> | 1195.6106  | Ginseng  |
| 548 | Senegose F                                                                                                        | C <sub>55</sub> H <sub>66</sub> O <sub>30</sub> | 1205.3561  | Polygala |
| 549 | Senegose I                                                                                                        | C <sub>55</sub> H <sub>66</sub> O <sub>30</sub> | 1205.3561  | Polygala |
| 550 | Ginsenoside Ra <sub>2</sub>                                                                                       | C <sub>58</sub> H <sub>98</sub> O <sub>26</sub> | 1209.6262  | Ginseng  |
| 551 | Ginsenoside Ra <sub>1</sub>                                                                                       | C <sub>58</sub> H <sub>98</sub> O <sub>26</sub> | 1209.6272  | Ginseng  |
| 552 | Notoginsenoside Fc                                                                                                | C <sub>58</sub> H <sub>98</sub> O <sub>26</sub> | 1210.6223  | Ginseng  |
| 553 | Polygalasaponin IV                                                                                                | C <sub>58</sub> H <sub>94</sub> O <sub>27</sub> | 1221.5904  | Polygala |
| 554 | Polygalasaponin V                                                                                                 | C <sub>58</sub> H <sub>94</sub> O <sub>27</sub> | 1221.5904  | Polygala |
| 555 | Tricornose L                                                                                                      | C <sub>55</sub> H <sub>68</sub> O <sub>31</sub> | 1223.3667  | Polygala |
|     | 3-O-β-D-Glucopyranosyl                                                                                            |                                                 |            |          |
|     | 2-oxo-olean-12-en-23,28-dioic acid                                                                                |                                                 |            |          |
| 556 | 28-O- {β-D-xylopyranosyl(1→4)-[β-D-apiofu<br>ranosyl(1→3)]-α-L-rhamnopyranosyl(1→2)-<br>β-D-glucopyranosyl} ester | C <sub>58</sub> H <sub>90</sub> O <sub>28</sub> | 1233.5541  | Polygala |
| 557 | Arilloside B                                                                                                      | C <sub>58</sub> H <sub>92</sub> O <sub>28</sub> | 1235.5697  | Polygala |
| 558 | Arillatanoside A                                                                                                  | C <sub>58</sub> H <sub>92</sub> O <sub>28</sub> | 1235.5697  | Polygala |

|     |                                                                                                                         |                                                  |            |          |
|-----|-------------------------------------------------------------------------------------------------------------------------|--------------------------------------------------|------------|----------|
| 559 | Polygalasaponin XXII<br>3-O-β-D-Glucopyranosyl medicagenic acid<br>28-O- {β-D-xylopyranosyl(1→4)-[β-D-apiofu            | C <sub>58</sub> H <sub>92</sub> O <sub>28</sub>  | 1235.5697  | Polygala |
| 560 | ranosyl<br>(1→3)]-α-L-rhamnopyranosyl(1→2)-β-D-glu<br>copyranosyl} ester                                                | C <sub>58</sub> H <sub>92</sub> O <sub>28</sub>  | 1235.5697  | Polygala |
| 561 | Dalmaiose J                                                                                                             | C <sub>59</sub> H <sub>66</sub> O <sub>29</sub>  | 1237.3612  | Polygala |
| 562 | Notoginsenoside Fa/R <sub>4</sub>                                                                                       | C <sub>59</sub> H <sub>100</sub> O <sub>27</sub> | 1239.63757 | Ginseng  |
| 563 | Ginsenoside Ra <sub>3</sub>                                                                                             | C <sub>59</sub> H <sub>100</sub> O <sub>27</sub> | 1239.6377  | Ginseng  |
| 564 | GinsenosideR <sub>4</sub>                                                                                               | C <sub>59</sub> H <sub>100</sub> O <sub>27</sub> | 1239.6379  | Ginseng  |
| 565 | Dalmaiose H                                                                                                             | C <sub>60</sub> H <sub>66</sub> O <sub>29</sub>  | 1249.3612  | Polygala |
| 566 | Dalmaiose D                                                                                                             | C <sub>57</sub> H <sub>70</sub> O <sub>31</sub>  | 1249.3823  | Polygala |
| 567 | Polygalasaponin XVIII                                                                                                   | C <sub>59</sub> H <sub>94</sub> O <sub>28</sub>  | 1249.5854  | Polygala |
| 568 | Micranthoside A                                                                                                         | C <sub>59</sub> H <sub>94</sub> O <sub>28</sub>  | 1249.5854  | Polygala |
| 569 | Polygalasaponin XXIV                                                                                                    | C <sub>58</sub> H <sub>92</sub> O <sub>29</sub>  | 1251.5646  | Polygala |
| 570 | Polygalasaponin VIII                                                                                                    | C <sub>59</sub> H <sub>96</sub> O <sub>28</sub>  | 1251.601   | Polygala |
| 571 | Polygalasaponin IX                                                                                                      | C <sub>59</sub> H <sub>96</sub> O <sub>28</sub>  | 1251.601   | Polygala |
| 572 | Polygalasaponin H                                                                                                       | C <sub>59</sub> H <sub>96</sub> O <sub>28</sub>  | 1251.601   | Polygala |
| 573 | Tricornose K                                                                                                            | C <sub>56</sub> H <sub>70</sub> O <sub>32</sub>  | 1253.3772  | Polygala |
| 574 | Ginsenoside Ra <sub>2</sub>                                                                                             | C <sub>58</sub> H <sub>98</sub> O <sub>26</sub>  | 1255.6291  | Ginseng  |
| 575 | Crotalarioside B                                                                                                        | C <sub>59</sub> H <sub>92</sub> O <sub>29</sub>  | 1263.5646  | Polygala |
| 576 | Tenuifoliose K                                                                                                          | C <sub>57</sub> H <sub>70</sub> O <sub>32</sub>  | 1265.3772  | Polygala |
| 577 | Desacylsenegasaponin B<br>3-O-(β-D-Glucopyranosyl) presenegenin                                                         | C <sub>59</sub> H <sub>94</sub> O <sub>29</sub>  | 1265.5803  | Polygala |
| 578 | 28-[O-β-D-galactopyranosyl-(1→4)-O-β-D-x<br>ylopyranosyl-(1→4)-O-α-L-rhamnopyranosyl<br>-(1→2)-β-D-fucopyranosyl] ester | C <sub>59</sub> H <sub>94</sub> O <sub>29</sub>  | 1265.5803  | Polygala |
| 579 | Polygalasaponin XVI                                                                                                     | C <sub>59</sub> H <sub>94</sub> O <sub>29</sub>  | 1265.5803  | Polygala |
| 580 | Dalmaiose L                                                                                                             | C <sub>60</sub> H <sub>68</sub> O <sub>30</sub>  | 1267.3717  | Polygala |
| 581 | Tricornose J                                                                                                            | C <sub>57</sub> H <sub>72</sub> O <sub>32</sub>  | 1267.3929  | Polygala |
| 582 | Dalmaiose E                                                                                                             | C <sub>58</sub> H <sub>72</sub> O <sub>32</sub>  | 1279.3929  | Polygala |
| 583 | Dalmaiose F                                                                                                             | C <sub>58</sub> H <sub>72</sub> O <sub>32</sub>  | 1279.3929  | Polygala |
| 584 | Tricornose H                                                                                                            | C <sub>57</sub> H <sub>72</sub> O <sub>33</sub>  | 1283.3878  | Polygala |
| 585 | Senegose D                                                                                                              | C <sub>57</sub> H <sub>72</sub> O <sub>33</sub>  | 1283.3878  | Polygala |
| 586 | Notoginsenoside R <sub>4</sub>                                                                                          | C <sub>59</sub> H <sub>100</sub> O <sub>27</sub> | 1285.6453  | Ginseng  |
| 587 | Dalmaiose B                                                                                                             | C <sub>59</sub> H <sub>72</sub> O <sub>32</sub>  | 1291.3929  | Polygala |
| 588 | Micranthoside B                                                                                                         | C <sub>61</sub> H <sub>96</sub> O <sub>29</sub>  | 1291.5959  | Polygala |
| 589 | Polygalasaponin XLII                                                                                                    | C <sub>64</sub> H <sub>94</sub> O <sub>27</sub>  | 1293.5904  | Polygala |
| 590 | Senegose K                                                                                                              | C <sub>58</sub> H <sub>72</sub> O <sub>33</sub>  | 1295.3878  | Polygala |
| 591 | Senegose M                                                                                                              | C <sub>58</sub> H <sub>72</sub> O <sub>33</sub>  | 1295.3878  | Polygala |
| 592 | Tenuifoliose C                                                                                                          | C <sub>58</sub> H <sub>72</sub> O <sub>33</sub>  | 1295.3878  | Polygala |
| 593 | Tenuifoliose E                                                                                                          | C <sub>58</sub> H <sub>72</sub> O <sub>33</sub>  | 1295.3878  | Polygala |
| 594 | Tricornose I                                                                                                            | C <sub>58</sub> H <sub>74</sub> O <sub>33</sub>  | 1297.4034  | Polygala |
| 595 | Tenuifoliose I                                                                                                          | C <sub>59</sub> H <sub>72</sub> O <sub>33</sub>  | 1307.3878  | Polygala |

|     |                                                                                                                                                                                   |                                                  |           |          |
|-----|-----------------------------------------------------------------------------------------------------------------------------------------------------------------------------------|--------------------------------------------------|-----------|----------|
| 596 | Tenuifoliose J                                                                                                                                                                    | C <sub>59</sub> H <sub>72</sub> O <sub>33</sub>  | 1307.3878 | Polygala |
| 597 | Polygalasaponin XXXIV                                                                                                                                                             | C <sub>61</sub> H <sub>96</sub> O <sub>30</sub>  | 1307.5908 | Polygala |
| 598 | Reinioside B                                                                                                                                                                      | C <sub>61</sub> H <sub>96</sub> O <sub>30</sub>  | 1307.5908 | Polygala |
| 599 | Polygalasaponin XXXVII                                                                                                                                                            | C <sub>61</sub> H <sub>96</sub> O <sub>30</sub>  | 1307.5908 | Polygala |
| 600 | Dalmaiosiose M                                                                                                                                                                    | C <sub>62</sub> H <sub>70</sub> O <sub>31</sub>  | 1309.3823 | Polygala |
| 601 | Dalmaiosiose G                                                                                                                                                                    | C <sub>59</sub> H <sub>74</sub> O <sub>33</sub>  | 1309.4034 | Polygala |
| 602 | Arilloside C                                                                                                                                                                      | C <sub>62</sub> H <sub>96</sub> O <sub>30</sub>  | 1319.5908 | Polygala |
| 603 | Fallaxose E                                                                                                                                                                       | C <sub>59</sub> H <sub>74</sub> O <sub>34</sub>  | 1325.3983 | Polygala |
| 604 | Senegose B                                                                                                                                                                        | C <sub>59</sub> H <sub>74</sub> O <sub>34</sub>  | 1325.3983 | Polygala |
| 605 | Senegose C                                                                                                                                                                        | C <sub>59</sub> H <sub>74</sub> O <sub>34</sub>  | 1325.3983 | Polygala |
| 606 | Tenuifoliose P                                                                                                                                                                    | C <sub>59</sub> H <sub>74</sub> O <sub>34</sub>  | 1325.3983 | Polygala |
| 607 | Reinioside J                                                                                                                                                                      | C <sub>60</sub> H <sub>74</sub> O <sub>34</sub>  | 1337.3983 | Polygala |
| 608 | Senegose J                                                                                                                                                                        | C <sub>60</sub> H <sub>74</sub> O <sub>34</sub>  | 1337.3983 | Polygala |
| 609 | Senegose L                                                                                                                                                                        | C <sub>60</sub> H <sub>74</sub> O <sub>34</sub>  | 1337.3983 | Polygala |
| 610 | Senegose N                                                                                                                                                                        | C <sub>60</sub> H <sub>74</sub> O <sub>34</sub>  | 1337.3983 | Polygala |
| 611 | Senegose O                                                                                                                                                                        | C <sub>60</sub> H <sub>74</sub> O <sub>34</sub>  | 1337.3983 | Polygala |
| 612 | Tenuifoliose B                                                                                                                                                                    | C <sub>60</sub> H <sub>74</sub> O <sub>34</sub>  | 1337.3983 | Polygala |
| 613 | Tenuifoliose D                                                                                                                                                                    | C <sub>60</sub> H <sub>74</sub> O <sub>34</sub>  | 1337.3983 | Polygala |
| 614 | Notoginsenoside S                                                                                                                                                                 | C <sub>63</sub> H <sub>106</sub> O <sub>30</sub> | 1341.6686 | Ginseng  |
| 615 | Tenuifoliose H                                                                                                                                                                    | C <sub>61</sub> H <sub>74</sub> O <sub>34</sub>  | 1349.3983 | Polygala |
| 616 | Polygalasaponin XXXV                                                                                                                                                              | C <sub>63</sub> H <sub>98</sub> O <sub>31</sub>  | 1349.6014 | Polygala |
| 617 | Reinioside C                                                                                                                                                                      | C <sub>63</sub> H <sub>98</sub> O <sub>31</sub>  | 1349.6014 | Polygala |
| 618 | Dalmaiosiose C                                                                                                                                                                    | C <sub>61</sub> H <sub>76</sub> O <sub>34</sub>  | 1351.414  | Polygala |
| 619 | 28-O-[α-L-Rhamnopyranosyl(1→4)-α-L-rhamnopyranosyl(1→4)-[β-D-xylofuranosyl(1→2)-β-D-xylopyranosyl(1→3)]-β-D-xylopyranosyl]-3-O-β-D-glucopyranosyl-16α-hydroxy medicagenate        | C <sub>63</sub> H <sub>100</sub> O <sub>31</sub> | 1351.6171 | Polygala |
| 620 | Reinioside I                                                                                                                                                                      | C <sub>61</sub> H <sub>76</sub> O <sub>35</sub>  | 1367.4089 | Polygala |
| 621 | Senegose A                                                                                                                                                                        | C <sub>61</sub> H <sub>76</sub> O <sub>35</sub>  | 1367.4089 | Polygala |
| 622 | Senegose E                                                                                                                                                                        | C <sub>61</sub> H <sub>76</sub> O <sub>35</sub>  | 1367.4089 | Polygala |
| 623 | 28-O-[β-D-Glucofuranosyl(1→2)-β-D-xylopyranosyl(1→4)-α-L-rhamnopyranosyl(1→4)-[α-D-xylopyranosyl(1→3)]-β-D-xylopyranosyl]-3-O-β-D-glucopyranosyl-medicagenate                     | C <sub>63</sub> H <sub>100</sub> O <sub>32</sub> | 1367.612  | Polygala |
| 624 | Notoginsenoside T                                                                                                                                                                 | C <sub>64</sub> H <sub>108</sub> O <sub>31</sub> | 1371.6792 | Ginseng  |
| 625 | Tenuifoliose A                                                                                                                                                                    | C <sub>62</sub> H <sub>76</sub> O <sub>35</sub>  | 1379.4089 | Polygala |
| 626 | Polygalasaponin XIX                                                                                                                                                               | C <sub>64</sub> H <sub>102</sub> O <sub>32</sub> | 1381.6276 | Polygala |
| 627 | Polygalasaponin X                                                                                                                                                                 | C <sub>64</sub> H <sub>104</sub> O <sub>32</sub> | 1383.6433 | Polygala |
| 628 | 3-O-(β-D-Glucopyranosyl) presenegenin<br>28-{O-α-L-arabinopyranosyl-(1→4)-O-β-D-xylopyranosyl-(1→4)-O-α-L-rhamnopyranosyl-(1→2)-4-O-[(E, Z)-4-methoxycinnamoyl]-β-D-fucopyranosyl | C <sub>68</sub> H <sub>100</sub> O <sub>30</sub> | 1395.6221 | Polygala |

|     |                                                                                                                                                   |                                                  |           |          |         |
|-----|---------------------------------------------------------------------------------------------------------------------------------------------------|--------------------------------------------------|-----------|----------|---------|
|     |                                                                                                                                                   |                                                  |           |          | } ester |
| 629 | Myrtifolioside D1/D2                                                                                                                              | C <sub>68</sub> H <sub>100</sub> O <sub>30</sub> | 1395.6221 | Polygala |         |
| 630 | Myrtifolioside E1/E2                                                                                                                              | C <sub>68</sub> H <sub>100</sub> O <sub>30</sub> | 1395.6221 | Polygala |         |
| 631 | Arilloside D                                                                                                                                      | C <sub>64</sub> H <sub>102</sub> O <sub>33</sub> | 1397.6225 | Polygala |         |
| 632 | Polygalasaponin XXIX                                                                                                                              | C <sub>64</sub> H <sub>102</sub> O <sub>33</sub> | 1397.6225 | Polygala |         |
| 633 | Desacylsenegasaponin A                                                                                                                            | C <sub>64</sub> H <sub>102</sub> O <sub>33</sub> | 1397.6225 | Polygala |         |
| 634 | Arillatanoside C                                                                                                                                  | C <sub>64</sub> H <sub>102</sub> O <sub>33</sub> | 1397.6225 | Polygala |         |
|     | 3-β-O-D-Glucopyranosyl-(1→2)-β-D-glucopyranosyl presenegenin                                                                                      |                                                  |           |          |         |
| 635 | 28-O-β-D-xylopyranosyl<br>(1→4)-[β-D-apiofuranosyl<br>(1→3)]-α-L-rhamnopyranosyl<br>(1→2)-β-D-fucopyranosyl ester                                 | C <sub>64</sub> H <sub>102</sub> O <sub>33</sub> | 1397.6225 | Polygala |         |
| 636 | Tenuifoliose O                                                                                                                                    | C <sub>63</sub> H <sub>78</sub> O <sub>36</sub>  | 1409.4195 | Polygala |         |
| 637 | Tenuifoliose N                                                                                                                                    | C <sub>63</sub> H <sub>78</sub> O <sub>36</sub>  | 1409.4195 | Polygala |         |
| 638 | Onjisaponin M                                                                                                                                     | C <sub>69</sub> H <sub>102</sub> O <sub>30</sub> | 1409.6378 | Polygala |         |
| 639 | Polygalasaponin L                                                                                                                                 | C <sub>64</sub> H <sub>100</sub> O <sub>34</sub> | 1411.6018 | Polygala |         |
| 640 | Desacylsenegin III                                                                                                                                | C <sub>65</sub> H <sub>104</sub> O <sub>33</sub> | 1411.6382 | Polygala |         |
| 641 | Polygalasaponin XLIX                                                                                                                              | C <sub>64</sub> H <sub>102</sub> O <sub>34</sub> | 1413.6175 | Polygala |         |
| 642 | Dalmaisiose I                                                                                                                                     | C <sub>67</sub> H <sub>78</sub> O <sub>34</sub>  | 1425.4296 | Polygala |         |
| 643 | E-Senegasaponin B                                                                                                                                 | C <sub>69</sub> H <sub>102</sub> O <sub>31</sub> | 1425.6327 | Polygala |         |
| 644 | Z-Senegasaponin B                                                                                                                                 | C <sub>69</sub> H <sub>102</sub> O <sub>31</sub> | 1425.6327 | Polygala |         |
|     | 3-O-(β-D-Glucopyranosyl) presenegenin                                                                                                             |                                                  |           |          |         |
| 645 | 28-(O-β-D-glucopyranosyl-(1→3)-O-α-L-arabinopyranosyl-(1→4)-O-α-L-rhamnopyranosyl-(1→2)-{4-O-[(E,Z)-4-methoxycinnamoyl]}-β-D-fucopyranosyl) ester | C <sub>69</sub> H <sub>102</sub> O <sub>31</sub> | 1425.6327 | Polygala |         |
|     | 3-O-(β-D-Glucopyranosyl) presenegenin                                                                                                             |                                                  |           |          |         |
| 646 | 28-{O-α-L-arabinopyranosyl-(1→4)-O-β-D-xylopyranosyl-(1→4)-O-α-L-rhamnopyranosyl-(1→2)-4-O-[(E)-3,4-dimethoxycinnamoyl]-β-D-fucopyranosyl} ester  | C <sub>69</sub> H <sub>102</sub> O <sub>31</sub> | 1425.6327 | Polygala |         |
| 647 | Myrtifolioside C1/ C2                                                                                                                             | C <sub>69</sub> H <sub>102</sub> O <sub>31</sub> | 1425.6327 | Polygala |         |
| 648 | Desacylsenegasaponin C                                                                                                                            | C <sub>65</sub> H <sub>104</sub> O <sub>34</sub> | 1427.6331 | Polygala |         |
|     | 3-O-(β-D-Glucopyranosyl) presenegenin                                                                                                             |                                                  |           |          |         |
| 649 | 28-{O-β-D-galactopyranosyl-(1→4)-O-[β-D-glucopyranosyl-(1→3)]-O-β-D-xylopyranosyl-(1→4)-O-α-L-rhamnopyranosyl-(1→2)-β-D-fucopyranosyl} ester      | C <sub>65</sub> H <sub>104</sub> O <sub>34</sub> | 1427.6331 | Polygala |         |
|     | 3-O-β-D-Glucopyranosyl                                                                                                                            |                                                  |           |          |         |
| 650 | presenegenin-28-O-β-D-galactopyranosyl-(1→3)-β-D-xylopyranosyl-(1→4)-α-L-rhamnopyranosyl-(1→2)-[β-D-glucopyr                                      | C <sub>65</sub> H <sub>104</sub> O <sub>34</sub> | 1427.6331 | Polygala |         |

|     |                                           |                                                  |           |          |
|-----|-------------------------------------------|--------------------------------------------------|-----------|----------|
|     | anosyl-(1→3)]- β-D-fucopyranoside         |                                                  |           |          |
| 651 | Arilloside E                              | C <sub>66</sub> H <sub>104</sub> O <sub>34</sub> | 1439.6331 | Polygala |
| 652 | Arillatanoside B                          | C <sub>66</sub> H <sub>104</sub> O <sub>34</sub> | 1439.6331 | Polygala |
| 653 | Glomeratose G                             | C <sub>67</sub> H <sub>78</sub> O <sub>35</sub>  | 1441.4246 | Polygala |
| 654 | Dalmaisiose P                             | C <sub>67</sub> H <sub>80</sub> O <sub>35</sub>  | 1443.4402 | Polygala |
| 655 | Tenuifoliose M                            | C <sub>65</sub> H <sub>82</sub> O <sub>37</sub>  | 1453.4457 | Polygala |
| 656 | Tenuifoliose Q                            | C <sub>65</sub> H <sub>82</sub> O <sub>37</sub>  | 1453.4457 | Polygala |
| 657 | Polygalasaponin XXXIX                     | C <sub>67</sub> H <sub>106</sub> O <sub>34</sub> | 1453.6488 | Polygala |
| 658 | Dalmaisiose K                             | C <sub>68</sub> H <sub>80</sub> O <sub>35</sub>  | 1455.4402 | Polygala |
| 659 | Dalmaisiose N                             | C <sub>68</sub> H <sub>80</sub> O <sub>35</sub>  | 1455.4402 | Polygala |
| 660 | E-Senegin II                              | C <sub>70</sub> H <sub>104</sub> O <sub>32</sub> | 1455.6433 | Polygala |
| 661 | Z-Senegin II                              | C <sub>70</sub> H <sub>104</sub> O <sub>32</sub> | 1455.6433 | Polygala |
| 662 | Onjisaponin G                             | C <sub>70</sub> H <sub>104</sub> O <sub>32</sub> | 1455.6433 | Polygala |
|     | 3-O-(β-D-Glucopyranosyl) presenegenin     |                                                  |           |          |
|     | 28-(O-β-D-glucopyranosyl-(1→3)-O-α-L-ara  |                                                  |           |          |
| 663 | binopyranosyl-(1→4)-O-α-L-rhamnopyranos   | C <sub>70</sub> H <sub>104</sub> O <sub>32</sub> | 1455.6433 | Polygala |
|     | yl-(1→2)-{4-O-[(E,                        |                                                  |           |          |
|     | Z)-3,4-dimethoxycinnamoyl]}-β-D-fucopyran |                                                  |           |          |
|     | osyl) ester                               |                                                  |           |          |
| 664 | Polygalasaponin XXXVIII                   | C <sub>67</sub> H <sub>106</sub> O <sub>35</sub> | 1469.6437 | Polygala |
| 665 | Onjisaponin Z                             | C <sub>71</sub> H <sub>106</sub> O <sub>32</sub> | 1469.6589 | Polygala |
| 666 | Arilloside F                              | C <sub>68</sub> H <sub>106</sub> O <sub>35</sub> | 1481.6437 | Polygala |
| 667 | Reinioside D                              | C <sub>68</sub> H <sub>106</sub> O <sub>35</sub> | 1481.6437 | Polygala |
| 668 | Tenuifoliose G                            | C <sub>66</sub> H <sub>84</sub> O <sub>38</sub>  | 1483.4563 | Polygala |
| 669 | Dalmaisiose O                             | C <sub>69</sub> H <sub>82</sub> O <sub>36</sub>  | 1485.4508 | Polygala |
| 670 | Onjisaponin E                             | C <sub>71</sub> H <sub>106</sub> O <sub>33</sub> | 1485.6538 | Polygala |
| 671 | Tenuifoliose L                            | C <sub>67</sub> H <sub>84</sub> O <sub>38</sub>  | 1495.4563 | Polygala |
| 672 | Reinioside F                              | C <sub>69</sub> H <sub>108</sub> O <sub>36</sub> | 1511.6542 | Polygala |
|     | 3-O-β-D-Glucopyranosyl presenegenin       |                                                  |           |          |
|     | 28-O-α-L-arabipyranosyl                   |                                                  |           |          |
| 673 | (1→3)-β-D-xylopyranosyl(1→4)-[ β-D-apiof  | C <sub>69</sub> H <sub>110</sub> O <sub>36</sub> | 1513.6699 | Polygala |
|     | uranosyl(1→3)]-α-L-rhamnopyranosyl(1→2)   |                                                  |           |          |
|     | -[α-L-rhamnopyranosyl(1→3)]-β-D-fucopyra  |                                                  |           |          |
|     | nosyl ester                               |                                                  |           |          |
| 674 | Polygalasaponin XXXVI                     | C <sub>70</sub> H <sub>108</sub> O <sub>36</sub> | 1523.6542 | Polygala |
| 675 | Reinioside E                              | C <sub>70</sub> H <sub>108</sub> O <sub>36</sub> | 1523.6542 | Polygala |
| 676 | Tenuifoliose F                            | C <sub>68</sub> H <sub>86</sub> O <sub>39</sub>  | 1525.4668 | Polygala |
| 677 | Arillatanoside D                          | C <sub>69</sub> H <sub>110</sub> O <sub>37</sub> | 1529.6648 | Polygala |
| 678 | E-Onjisaponin H                           | C <sub>74</sub> H <sub>110</sub> O <sub>34</sub> | 1541.6801 | Polygala |
| 679 | Z-Onjisaponin H                           | C <sub>74</sub> H <sub>110</sub> O <sub>34</sub> | 1541.6801 | Polygala |
| 680 | Onjisaponin Pg                            | C <sub>70</sub> H <sub>110</sub> O <sub>37</sub> | 1545.675  | Polygala |
| 681 | Polygalasaponin XLIII                     | C <sub>74</sub> H <sub>110</sub> O <sub>35</sub> | 1557.675  | Polygala |
| 682 | E-Senegasaponin A                         | C <sub>74</sub> H <sub>110</sub> O <sub>35</sub> | 1557.675  | Polygala |
| 683 | Z-Senegasaponin A                         | C <sub>74</sub> H <sub>110</sub> O <sub>35</sub> | 1557.675  | Polygala |

|     |                                                                                                                                                                                   |                                                  |           |          |
|-----|-----------------------------------------------------------------------------------------------------------------------------------------------------------------------------------|--------------------------------------------------|-----------|----------|
| 684 | Myrtifolioside B1                                                                                                                                                                 | C <sub>74</sub> H <sub>110</sub> O <sub>35</sub> | 1557.675  | Polygala |
| 685 | Myrtifolioside B2                                                                                                                                                                 | C <sub>74</sub> H <sub>110</sub> O <sub>35</sub> | 1557.675  | Polygala |
| 686 | E-Senegin III                                                                                                                                                                     | C <sub>75</sub> H <sub>112</sub> O <sub>35</sub> | 1571.6906 | Polygala |
| 687 | Z-Senegin III                                                                                                                                                                     | C <sub>75</sub> H <sub>112</sub> O <sub>35</sub> | 1571.6906 | Polygala |
| 688 | Onjisaponin B                                                                                                                                                                     | C <sub>75</sub> H <sub>112</sub> O <sub>35</sub> | 1571.6906 | Polygala |
| 689 | Polygalasaponin XXX                                                                                                                                                               | C <sub>75</sub> H <sub>112</sub> O <sub>36</sub> | 1587.6855 | Polygala |
| 690 | Polygalasaponin XXXI                                                                                                                                                              | C <sub>75</sub> H <sub>112</sub> O <sub>36</sub> | 1587.6855 | Polygala |
| 691 | Onjisaponin F                                                                                                                                                                     | C <sub>75</sub> H <sub>112</sub> O <sub>36</sub> | 1587.6855 | Polygala |
|     | 3-O-(β-D-Glucopyranosyl) presenegenin                                                                                                                                             |                                                  |           |          |
|     | 28-(O-β-D-galactopyranosyl-(1→4)-O-[β-D-glucopyranosyl-(1→3)]-O-β-D-xylopyranosyl-(1→4)-O-α-L-rhamnopyranosyl-(1→2)-{4-O-[(E,Z)-4-methoxycinnamoyl]}-β-D-fucopyranosyl) ester     |                                                  |           |          |
| 692 |                                                                                                                                                                                   | C <sub>75</sub> H <sub>112</sub> O <sub>36</sub> | 1587.6855 | Polygala |
| 693 | Onjisaponin Gg                                                                                                                                                                    | C <sub>76</sub> H <sub>112</sub> O <sub>36</sub> | 1599.6855 | Polygala |
| 694 | Onjisaponin K                                                                                                                                                                     | C <sub>76</sub> H <sub>112</sub> O <sub>36</sub> | 1599.6855 | Polygala |
| 695 | Polygalasaponin XLIV                                                                                                                                                              | C <sub>76</sub> H <sub>114</sub> O <sub>37</sub> | 1617.6961 | Polygala |
| 696 | Onjisaponin R                                                                                                                                                                     | C <sub>76</sub> H <sub>114</sub> O <sub>37</sub> | 1617.6961 | Polygala |
|     | 3-O-(β-D-Glucopyranosyl) presenegenin                                                                                                                                             |                                                  |           |          |
|     | 28-(O-β-D-galactopyranosyl-(1→4)-O-[β-D-glucopyranosyl-(1→3)]-O-β-D-xylopyranosyl-(1→4)-O-α-L-rhamnopyranosyl-(1→2)-{4-O-[(E,Z)-3,4-dimethoxycinnamoyl]}-β-D-fucopyranosyl) ester |                                                  |           |          |
| 697 |                                                                                                                                                                                   | C <sub>76</sub> H <sub>114</sub> O <sub>37</sub> | 1617.6961 | Polygala |
| 698 | Polygalajaponicose I                                                                                                                                                              | C <sub>75</sub> H <sub>90</sub> O <sub>40</sub>  | 1629.493  | Polygala |
| 699 | E -Senegasaponin C                                                                                                                                                                | C <sub>77</sub> H <sub>114</sub> O <sub>37</sub> | 1629.6961 | Polygala |
| 700 | Z -Senegasaponin C                                                                                                                                                                | C <sub>77</sub> H <sub>114</sub> O <sub>37</sub> | 1629.6961 | Polygala |
| 701 | Onjisaponin O                                                                                                                                                                     | C <sub>77</sub> H <sub>116</sub> O <sub>37</sub> | 1631.7117 | Polygala |
| 702 | Polygalasaponin XL                                                                                                                                                                | C <sub>74</sub> H <sub>116</sub> O <sub>40</sub> | 1643.6965 | Polygala |
| 703 | Polygalasaponin XLV                                                                                                                                                               | C <sub>78</sub> H <sub>116</sub> O <sub>38</sub> | 1659.7067 | Polygala |
| 704 | Polygalasaponin XLVI                                                                                                                                                              | C <sub>78</sub> H <sub>116</sub> O <sub>38</sub> | 1659.7067 | Polygala |
| 705 | Onjisaponin W                                                                                                                                                                     | C <sub>79</sub> H <sub>116</sub> O <sub>38</sub> | 1671.7067 | Polygala |
| 706 | Polygalasaponin XXXII                                                                                                                                                             | C <sub>79</sub> H <sub>118</sub> O <sub>38</sub> | 1673.7223 | Polygala |
| 707 | Tenuifoside A                                                                                                                                                                     | C <sub>79</sub> H <sub>118</sub> O <sub>38</sub> | 1673.7223 | Polygala |
| 708 | Micranthoside C                                                                                                                                                                   | C <sub>75</sub> H <sub>120</sub> O <sub>41</sub> | 1675.7227 | Polygala |
| 709 | Polygalasaponin XLI                                                                                                                                                               | C <sub>76</sub> H <sub>118</sub> O <sub>41</sub> | 1685.7071 | Polygala |
| 710 | Onjisaponin Ng                                                                                                                                                                    | C <sub>80</sub> H <sub>118</sub> O <sub>38</sub> | 1685.7223 | Polygala |
| 711 | OnjisaponinQg                                                                                                                                                                     | C <sub>76</sub> H <sub>120</sub> O <sub>41</sub> | 1687.7227 | Polygala |
| 712 | Myrtifolioside A1                                                                                                                                                                 | C <sub>79</sub> H <sub>118</sub> O <sub>39</sub> | 1689.7172 | Polygala |
| 713 | Myrtifolioside A2                                                                                                                                                                 | C <sub>79</sub> H <sub>118</sub> O <sub>39</sub> | 1689.7172 | Polygala |
| 714 | E-Senegin IV                                                                                                                                                                      | C <sub>80</sub> H <sub>120</sub> O <sub>39</sub> | 1703.7329 | Polygala |
| 715 | Z-Senegin IV                                                                                                                                                                      | C <sub>80</sub> H <sub>120</sub> O <sub>39</sub> | 1703.7329 | Polygala |

|     |                      |                                                  |           |            |
|-----|----------------------|--------------------------------------------------|-----------|------------|
| 716 | Onjisaponin A        | C <sub>80</sub> H <sub>120</sub> O <sub>39</sub> | 1703.7329 | Polygala   |
| 717 | OnjisaponinFg        | C <sub>81</sub> H <sub>120</sub> O <sub>40</sub> | 1731.7278 | Polygala   |
| 718 | Onjisaponin S        | C <sub>81</sub> H <sub>122</sub> O <sub>40</sub> | 1733.7434 | Polygala   |
| 719 | Onjisaponin Y        | C <sub>82</sub> H <sub>122</sub> O <sub>41</sub> | 1761.7384 | Polygala   |
| 720 | Onjisaponin V        | C <sub>82</sub> H <sub>122</sub> O <sub>41</sub> | 1761.7384 | Polygala   |
| 721 | Onjisaponin Vg       | C <sub>82</sub> H <sub>122</sub> O <sub>41</sub> | 1761.7384 | Polygala   |
| 722 | Onjisaponin T        | C <sub>84</sub> H <sub>128</sub> O <sub>41</sub> | 1791.7853 | Polygala   |
| 723 | Onjisaponin J        | C <sub>85</sub> H <sub>126</sub> O <sub>42</sub> | 1817.7646 | Polygala   |
| 724 | Onjisaponin L        | C <sub>86</sub> H <sub>128</sub> O <sub>43</sub> | 1847.7751 | Polygala   |
| 725 | Onjisaponin Sg       | C <sub>87</sub> H <sub>130</sub> O <sub>44</sub> | 1877.7857 | Polygala   |
| 726 | Onjisaponin Ug       | C <sub>87</sub> H <sub>130</sub> O <sub>45</sub> | 1893.7806 | Polygala   |
| 727 | Onjisaponin X        | C <sub>87</sub> H <sub>130</sub> O <sub>45</sub> | 1893.7806 | Polygala   |
| 728 | OnjisaponinTg        | C <sub>90</sub> H <sub>136</sub> O <sub>45</sub> | 1935.8276 | Polygala   |
| 729 | pinicolic acid A     | C <sub>30</sub> H <sub>46</sub> O <sub>3</sub>   | 453.68    | Poriacocos |
| 730 | dehydropachymic acid | C <sub>33</sub> H <sub>50</sub> O <sub>5</sub>   | 525.75    | Poriacocos |
| 731 | Floralginsenoside A  | C <sub>42</sub> H <sub>72</sub> O <sub>16</sub>  | 831.4748  | Ginseng    |
